# 1 Precise spatial representations in the hippocampus of a 2 food-caching bird

3 Hannah L. Payne<sup>1</sup>, Galen F. Lynch<sup>2</sup>, Dmitriy Aronov<sup>1\*</sup>

4 <sup>1</sup>Zuckerman Mind Brain Behavior Institute, Columbia University, New York, NY 10027, USA

5 <sup>2</sup>Department of Brain and Cognitive Sciences, McGovern Institute for Brain Research, Massachusetts Institute of  
6 Technology, Cambridge, MA 02139

7 \*Corresponding author

## 8 Main text

### 9 Summary

10 The hippocampus is an ancient neural circuit required for the formation of episodic memories. In mammals, this ability  
11 is thought to depend on well-documented patterns of neural activity, including place cells and sharp wave ripples.  
12 Notably, neither pattern has been found in non-mammals, despite compelling examples of episodic-like memory across  
13 a wide range of vertebrates. Does episodic memory nonetheless have a universal implementation across distant neural  
14 systems? We addressed this question by recording neural activity in the hippocampus of the tufted titmouse – an intense  
15 memory specialist from a food-caching family of birds. These birds cache large numbers of food items at scattered,  
16 concealed locations and use hippocampus-dependent memory to retrieve their caches. We found remarkably precise  
17 spatial representations akin to classic place cells, as well as sharp wave ripples, in the titmouse hippocampus. These  
18 patterns were organized along similar anatomical axes to those found in mammals. In contrast, spatial coding was weaker  
19 in a different, non-food-caching bird species. Our findings suggest a striking conservation of hippocampal mechanisms  
20 across distant vertebrates, in spite of vastly divergent anatomy and cytoarchitecture. At the same time, these results  
21 demonstrate that the exact implementation of such common mechanisms may conform to the unique ethological needs  
22 of different species.

### 23 Introduction

24 The hippocampus is critical for forming memories of experienced events, or episodic memories<sup>1,2</sup>. It has been a challenge  
25 to relate this function to specific patterns of neural activity. A central, experimentally tractable component of episodic  
26 memories is the storage of spatial information about *where* an experience occurred. In the mammalian hippocampus,  
27 spatial memory is thought to depend on two striking features of neural activity. During movement, place cells precisely  
28 represent spatial location<sup>3</sup>, whereas during wakeful immobility or sleep, firing patterns are reactivated in synchronized  
29 events called sharp wave ripples (SWRs)<sup>4</sup>. It is hypothesized that place cells represent the spatial component of episodic  
30 memories<sup>5</sup>, whereas SWRs reactivate and consolidate the memories<sup>6,7</sup>.

31 An enduring mystery is that place cells and SWRs have not been identified in the hippocampus of non-mammals,  
32 including multiple bird species, despite numerous recordings<sup>8–13</sup>. In spite of this absence, compelling examples of  
33 episodic-like, spatial memory have been demonstrated in a wide range of species, including fish, birds, and non-avian  
34 reptiles<sup>14–16</sup>. Memory in these non-mammals relies on a hippocampal structure<sup>14,17,18</sup> that shares embryological origins  
35 with its mammalian counterpart<sup>19,20</sup> and expresses many of the same genetic markers<sup>19–21</sup>. Given the apparent  
36 differences in hippocampal activity between species, it is therefore unclear which features of neural activity are  
37 fundamental, and which are dispensable, for hippocampus-dependent spatial memory.

38 The reported lack of mammalian-like hippocampal activity in non-mammals may not be surprising given dramatic  
39 differences in hippocampal anatomy across species. In mammals, sensory inputs indirectly reach the hippocampus after  
40 extensive processing by a six-layered cortex<sup>22,23</sup>. Inputs from different cortical regions are anatomically organized and  
41 are thought to account for functional specializations of different parts of the hippocampus<sup>24</sup>. The hippocampus itself is

42 laminated and features a prominent pyramidal cell layer. In contrast, non-mammals have neither a six-layered cortex<sup>25</sup>  
43 nor a hippocampal pyramidal cell layer<sup>26,27</sup>, and hippocampal inputs are not known to be organized. These differences  
44 raise the question of how similar hippocampal memory functions are implemented by fundamentally different neural  
45 circuits across species.

46 To address this question, it is critical to examine neural activity across species that have comparable mnemonic abilities.  
47 We therefore focused on a non-mammal with exceptional spatial memory: a food-caching bird. Food-caching birds store  
48 many individual pieces of food at scattered, concealed locations in their environment and later retrieve these caches  
49 using memory<sup>15,16</sup>. Accurate retrieval requires the hippocampus, which is grossly enlarged in these memory  
50 specialists<sup>17,18,28</sup>. To investigate what physiological and anatomical substrates might enable robust spatial memory, we  
51 systematically recorded throughout the avian hippocampus, both during locomotion and during sleep.

## 52 Results

53 We first asked whether spatial activity could be detected in the hippocampus of a food-caching bird. We designed  
54 miniature microdrives that allowed unconstrained locomotion of a small bird in a two-dimensional arena. These  
55 microdrives were implanted into the hippocampus of tufted titmice — food-caching members of the *Paridae* family,  
56 which also includes chickadees<sup>29</sup> (Extended Data Fig. 1). For comparison with classic studies of the rodent hippocampus,  
57 we recorded single cells while titmice foraged for sunflower seed fragments randomly dispensed throughout the arena  
58 (**Fig. 1a-c** and Extended Data Fig. 2).

59 Birds are far removed from mammals in evolution<sup>30</sup>, and it is unknown whether the basic cellular components of the  
60 hippocampus are comparable across species. As a preliminary step, we therefore analyzed electrophysiological  
61 characteristics of the recorded neurons. This analysis revealed two prominent clusters ( $n = 538$  and  $217$  cells). Cells in  
62 the first cluster had lower firing rates, wider spikes, and a larger first peak of the spike waveform than cells in the second  
63 cluster (**Fig. 1d,e**). Cells in the first cluster were also more likely to fire in bursts (CV2 1.14 (SD 0.15) and 0.86 (SD 0.14),  
64 respectively,  $p = 10^{-88}$ , two-sided t-test). Together, these characteristics are a remarkable match to those of excitatory  
65 and inhibitory neurons in the mammalian hippocampus, respectively<sup>31</sup>. In fact, we occasionally recorded pairs of cells on  
66 the same electrode, and in a large fraction of these cases, the cross-correlogram of spike times suggested a monosynaptic  
67 connection consistent with the putative identities (Extended Data Fig. 3). The basic classes of hippocampal neurons  
68 therefore appear to be conserved between birds and mammals. We will refer to cells in these classes as excitatory and  
69 inhibitory neurons.

70 Surprisingly, the firing of many neurons in the titmouse hippocampus was precisely localized in space (**Fig. 1f**). We used  
71 two conventional criteria to identify such cells. First, we measured “spatial information” as the mutual information  
72 between firing rate and location. Second, we measured “spatial stability” by cross-correlating firing rate maps from  
73 disjoint subsets of the recording session. Many neurons passed criteria for both: significantly high spatial information  
74 and significantly high spatial stability (quantified below). Of these cells, excitatory neurons often displayed spatially  
75 restricted firing fields that were highly reminiscent of rodent place fields. Across the population, significant firing fields  
76 fully tiled the environment (Extended Data Fig. 4). In rats, place cells are not simply responsive to the animal’s location,  
77 but predict future position by 100-200 ms<sup>32</sup>. Despite different methods of locomotion in titmice and rats (discrete hops  
78 vs. continuous walking), we found that titmouse hippocampal cells were also most strongly tuned to future position  
79 (mean best delay 220 ms for spatial information and 204 ms for spatial stability; both greater than 0,  $p < 10^{-14}$ , two-sided  
80 t-test,  $n = 309$  and  $307$ , respectively; **Fig. 1g**). Additionally, some neurons displayed head direction and speed tuning  
81 (Extended Data Fig. 5). In separate experiments, neurons also displayed directional tuning on a linear track (Extended  
82 Data Fig. 6). The titmouse hippocampus therefore displays many features of activity previously observed in mammals  
83 and, notably, contains neurons resembling classic place cells. We will proceed to use the term “place cell” for excitatory  
84 neurons with significantly high spatial information and stability.

85 The fraction of neurons classified as place cells varied strongly across recording locations, raising the possibility that place  
86 cells are anatomically organized within the hippocampus. We therefore systematically sampled throughout the volume

87 of the hippocampus by varying the recording location across birds. We registered these locations to a template brain by  
88 constructing a three-dimensional model of the titmouse hippocampus (Extended Data Fig. 1). Both spatial information  
89 and spatial stability were strongly correlated to the recording location along the anterior-posterior axis ( $p < 10^{-5}$  for both  
90 measures; see Methods; **Fig. 2**), but not along the other two axes ( $p > 0.27$  for both measures across both axes; Extended  
91 Data Fig. 7). Place cells were essentially restricted to the anterior two-thirds of the hippocampus, with incidence  
92 increasing from under 10% of excitatory cells at the posterior end to over 70% at the anterior end. This dramatic gradient  
93 is reminiscent of a similar specialization in the dorsal hippocampus of rodents<sup>33</sup>. In fact, the anterior-posterior axis of the  
94 avian hippocampus likely shares developmental origins with the rodent dorso-ventral axis (the “long” axis)<sup>19–21,34</sup>. Thus,  
95 not only the activity patterns, but even their anatomical organization, may be conserved across species.

96 Why did previous recordings in birds not reveal similar spatial representations<sup>9–11,13</sup>? One possibility is that place coding  
97 is species-specific, perhaps related to the ethological demands or experiences of a particular organism. As a result, place  
98 cells may be less common, less spatially precise, or more anatomically restricted in other species. To explore these  
99 possibilities while ruling out the effects of experimental technique, we repeated our random foraging recordings in the  
100 zebra finch — a species that, like those previously studied, is domesticated and does not cache food.

101 Systematic recordings across the zebra finch hippocampus revealed neurons with spatially modulated firing. As in titmice,  
102 place cells were found almost exclusively in the anterior hippocampus (Extended Data Fig. 8). Yet, in comparison to  
103 titmice, spatial activity was noticeably weaker and less abundant in the zebra finch. To quantify this difference, we sought  
104 to account both for a larger size of the titmouse hippocampus and for different sampling of neurons across the long axis  
105 in the two species. We therefore made comparisons in two ways, using landmarks defined either functionally or  
106 anatomically.

107 First, we defined an anterior segment of the hippocampus functionally, using the density of spatial cells in each species  
108 (see Methods). This segment was proportionately larger in titmice than in zebra finches (60% vs. 49% of the anterior-  
109 posterior extent of the hippocampus). Further, even within the anterior segment there was a greater density of place  
110 cells in titmice (60% vs. 47% of cells at the anterior pole; **Fig. 3a**). To illustrate this difference visually, we sorted cells in  
111 the anterior segment by spatial information to compare neurons with similar rank. More than 50% of these cells in titmice  
112 had spatial rate maps resembling those of classic place cells, whereas only about 15% did so in zebra finches (**Fig. 3b**).

113 Second, we identified a reliable anatomical landmark that divided the hippocampus roughly in half volumetrically (see  
114 Methods). We compared spatial information and spatial stability between species on the anterior and posterior sides of  
115 this divide. Both measures were significantly larger in titmice than in zebra finches in the anterior hippocampus ( $p = 0.002$   
116 and  $p = 0.0009$ , respectively), but not in the posterior hippocampus ( $p > 0.5$ ; species difference was larger in anterior vs.  
117 posterior hippocampus,  $p < 0.01$ ). Together, our analyses reveal a difference between species: place cells are more  
118 abundant and activity is more spatially precise and stable in titmice than in zebra finches. Such variability across species,  
119 as well as a dearth of place cells in a large posterior fraction of the hippocampus, might explain the reported absence of  
120 place cells in other non-food-caching birds<sup>9–11,13</sup>.

121 Our results so far show that “online” patterns of neural activity during active behavior are more similar between  
122 mammals and birds than previously thought. Might there be similarities in “offline” activity as well? In the mammalian  
123 hippocampus, periods of quiescence contain SWRs, defined by 1) a fast “ripple” oscillation in the local field potential  
124 (LFP), 2) a slower “sharp wave” deflection, and 3) synchronization of neural spikes to the ripple<sup>4</sup>. We examined activity  
125 during sleep in the avian hippocampus and indeed found events with these characteristics (in titmice: **Fig. 4a,b** and in  
126 zebra finches: Extended Data Fig. 8). SWRs were frequent (mean rate range 0.6–1.1 events/s in four titmice,  $n = 4–17$   
127 sessions, using conventional thresholds applied to the LFP in the 100–200 Hz frequency band; see Methods). As in  
128 rodents<sup>31</sup>, both excitatory and inhibitory cells increased firing during SWRs, but preferred different phases of the ripple  
129 oscillation (Extended Data Fig. 9). Thus, events resembling classic mammalian SWRs are indeed present in birds. In  
130 contrast, we did not observe continuous oscillations at any lower frequencies, including in the theta band, confirming  
131 that such oscillations are not universally required for spatial coding in the hippocampus (as in bats<sup>35</sup>; Extended Data Fig.  
132 10).

133 A critical feature of SWRs in mammals is their global nature: events often extend across much of the hippocampal long  
134 axis, sometimes propagating in either direction<sup>36</sup>. We examined the organization of SWRs in titmice by implanting  
135 electrode arrays spanning >5 mm of the long axis. We found that individual events indeed often appeared to propagate  
136 across the hippocampus (**Fig. 4c**). About half of the events occurred on more than one electrode, with a sizeable fraction  
137 spanning most of the recorded extent of the hippocampus (length constant 0.90 mm; **Fig. 4d**). The median speed of  
138 propagation was 0.12 m/s (median absolute deviation 0.07 m/s, see Methods), and there was an abundance of events  
139 propagating in the posterior-to-anterior direction (70%,  $n = 15795$  SWRs from 18 sessions from 2 birds; **Fig. 4d,e**), roughly  
140 consistent with the speed and directional bias observed in sleeping rats<sup>36</sup>. SWRs are therefore global events in the avian  
141 hippocampus, with organization across the long axis similar to that in mammals.

142 In mammals, the ability to detect SWRs is thought to depend on the crystalline cytoarchitecture of the hippocampus  
143 across the transverse plane (the plane perpendicular to the long axis)<sup>37,38</sup>. This includes a densely packed, planar  
144 pyramidal cell layer and parallel dendrites that allow small voltages to add together in the LFP. We were therefore  
145 surprised to observe SWRs in birds, whose hippocampus has only a modest clustering of cell bodies in a medially-  
146 restricted V-shaped region<sup>26,27</sup> (**Fig. 1b**). Might there be hidden structure in the avian hippocampus that generates SWRs?

147 We noticed that as we lowered electrodes through the hippocampus, the sharp wave component often inverted from  
148 positive to negative polarity (**Fig. 4f**). To systematically examine SWRs across the transverse plane, we implanted  
149 additional titmice with arrays of electrodes oriented in the medial-lateral direction and recorded throughout the depth  
150 of the hippocampus (**Fig. 4g**). We then constructed two-dimensional current source density (CSD) maps to infer locations  
151 of sources and sinks (e.g. net positive current flowing out of or into cells, respectively)<sup>37</sup>. Remarkably, we observed a  
152 clear layered structure in the CSD map, with a current source located dorsal to a sink (**Fig. 4g,h**). Thus, there appears to  
153 be a laminar organization in the LFP of the titmouse hippocampus, in spite of dramatically different cytoarchitecture  
154 from mammals (**Fig. 4i**).

## 155 Discussion

156 Place cells and SWRs are classic signatures of hippocampal function in mammals, but were unexpected in the avian brain.  
157 Birds are separated from mammals by 310 million years of evolution<sup>30</sup>, resulting in a hippocampus that is nearly  
158 unrecognizable at the levels of macroanatomy and cytoarchitecture<sup>25</sup>. Birds and mammals have divergent sensory  
159 systems, use these senses differently for navigation, and exhibit distinct methods of locomotion through the  
160 environment<sup>39</sup>. In fact, previous studies in non-mammals have not reported either hippocampal SWRs or precise spatial  
161 neurons akin to place cells<sup>8-13</sup>. Our results in such a distant system suggest that these activity patterns may be even more  
162 fundamental to memory functions of the hippocampus across amniotes (mammals, non-avian reptiles, and birds) than  
163 previously appreciated.

164 The anatomical organization of these activity patterns is equally surprising. We found two patterns of organization: a  
165 steep gradient of increasing place coding in the anterior direction, and a layered arrangement of current source densities  
166 during SWRs orthogonal to this direction. This organization is consistent with a conjectured homology of hippocampal  
167 axes across species: the anterior-posterior axis corresponds to the “long” dorso-ventral axis in rodents (posterior-anterior  
168 in primates), while the orthogonal direction corresponds to the radial axis<sup>19-21,34</sup>. In mammals these two functional axes  
169 are thought to result from organized anatomical features that are not apparent in birds: extrinsic inputs localized across  
170 the long axis<sup>24</sup>, and dramatic lamination across the radial axis<sup>37,38</sup>. Our results suggest that, in spite of these overt  
171 differences in anatomy, there are likely to be hidden, as-of-yet unidentified patterns of connectivity and cytoarchitecture  
172 that are conserved across species.

173 Place coding was present across two avian species, but was weaker in zebra finches than in titmice. There are many  
174 innate and experience-related differences between these birds (e.g. domestication), but it is tempting to speculate that  
175 precise spatial coding in titmice is related to the demands imposed by their food-caching behavior. Place cell activity is  
176 sparse<sup>40</sup>, and sparsity can allow neural circuits to form new memories quickly, while avoiding interference with old  
177 memories<sup>40,41</sup>. Since food-caching requires rapid memorization of new locations without forgetting old ones, increased

178 sparsity of underlying neural circuits may confer an adaptive advantage to food-caching birds. However, the cost of  
179 sparse coding is a requirement for more neurons<sup>42</sup>. Thus, the benefit of sparsity in these species may have driven the  
180 enlargement of the hippocampus<sup>28</sup>, the prodigious capacity for spatial memory, as well as the abundance of spatially  
181 precise neurons that we found. Our results demonstrate a remarkable case of functional and anatomical conservation in  
182 a higher brain region of distant species. At the same time, these findings contribute to the growing body of evidence that  
183 hippocampal coding conforms to the unique ethological demands of different animals<sup>43–49</sup>.

## 184 Acknowledgements

185 This work was supported by the Helen Hay Whitney Foundation Fellowship (H.L.P.), New York Stem Cell Foundation –  
186 Robertson Neuroscience Investigator Award, and the Beckman Young Investigator Award. We thank D. Scheck, S. Hale,  
187 T. Tabachnik, R. Hormigo, and K. Gutnichenko for technical assistance; M. Fee for the contribution to microdrive design;  
188 the Black Rock Forest Consortium, J. Scribner and Hickory Hill Farm, and T. Green for help with field work; L. Abbott and  
189 members of the Aronov lab for comments on the manuscript. The illustration of the arena in Fig. 1c and birds in Fig. 3a  
190 are by J. Kuhl.

191 **Main figures**

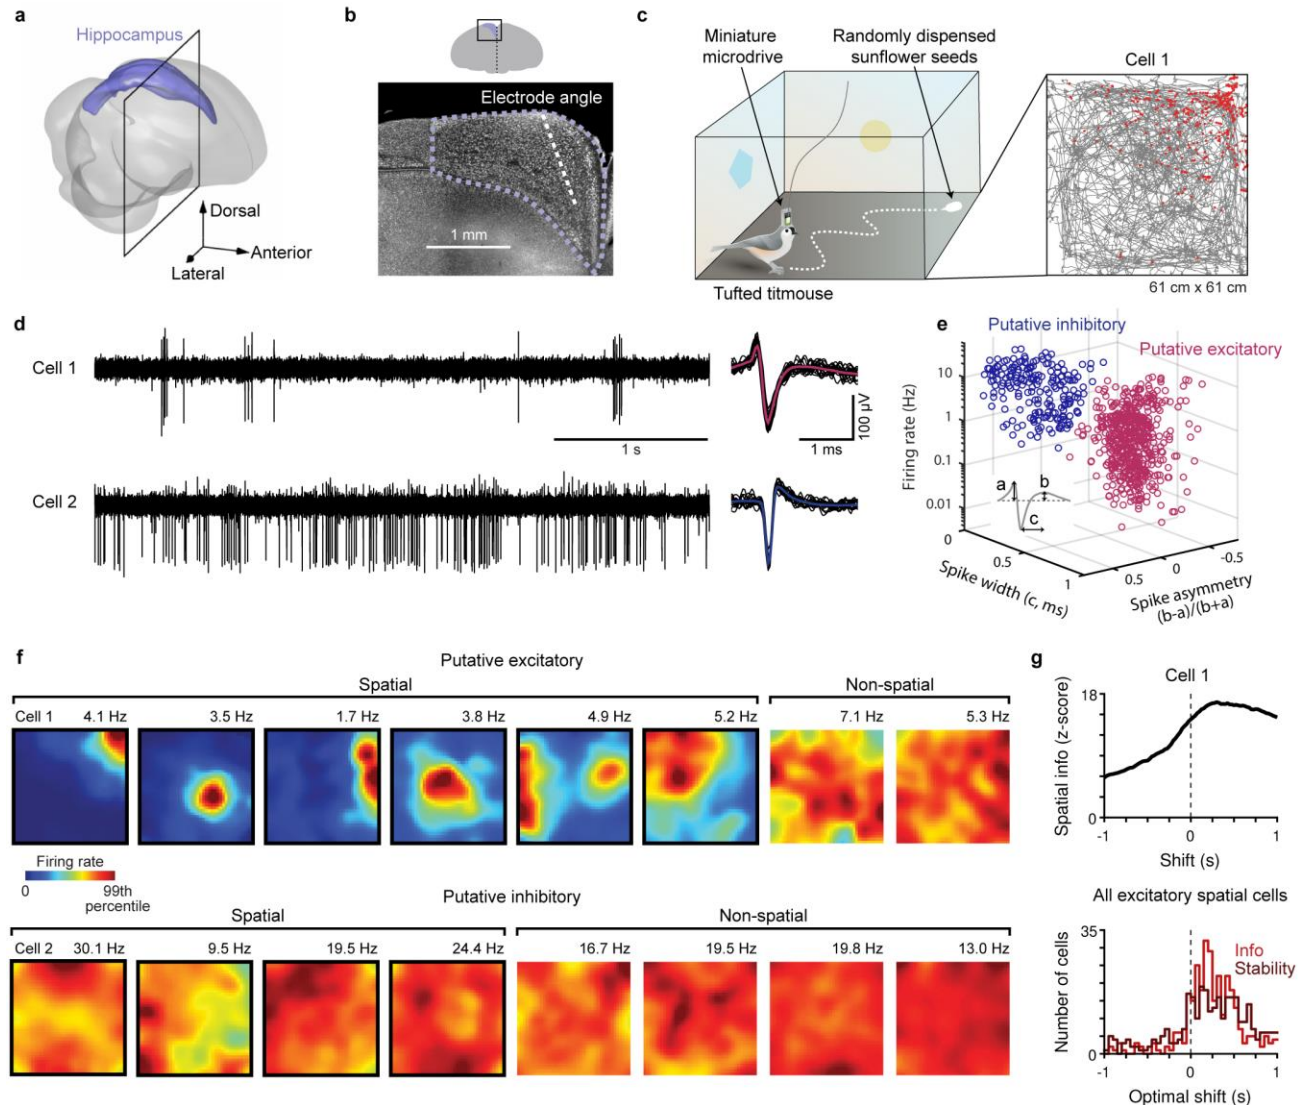

192 **Figure 1: Place cells in the hippocampus of tufted titmice**

193 **a**, Reconstruction of the titmouse hippocampus.

194 **b**, Fluorescent Nissl-stained coronal section at the location indicated by the black box in **a**. Dashed purple: hippocampal boundary.  
 195 Dashed white: electrode approach angle.

196 **c**, Left, schematic of the random foraging arena. Right, bird's trajectory (grey line) and locations of spikes (red dots) for an example  
 197 hippocampal cell. Cell 1 refers to the same neuron in all panels.

198 **d**, Voltage traces and 20 example spike waveforms for two example cells (black: examples; pink or blue: mean).

199 **e**, Electrophysiological characteristics for all cells recorded during the random foraging task, classified as excitatory ( $n = 538$ ) and  
 200 inhibitory cells ( $n = 217$ ) (see Methods).

201 **f**, Example spatial rate maps for excitatory and inhibitory neurons. Numbers above plot indicate maximum of color scale.

202 **g**, Top, spatial information as the time shift between spikes and behavior was varied for an example cell. The peak at a positive shift  
 203 ("optimal shift") means that spikes were most informative about the bird's future position. Bottom, histogram of optimal shifts for  
 204 spatial information and spatial stability.

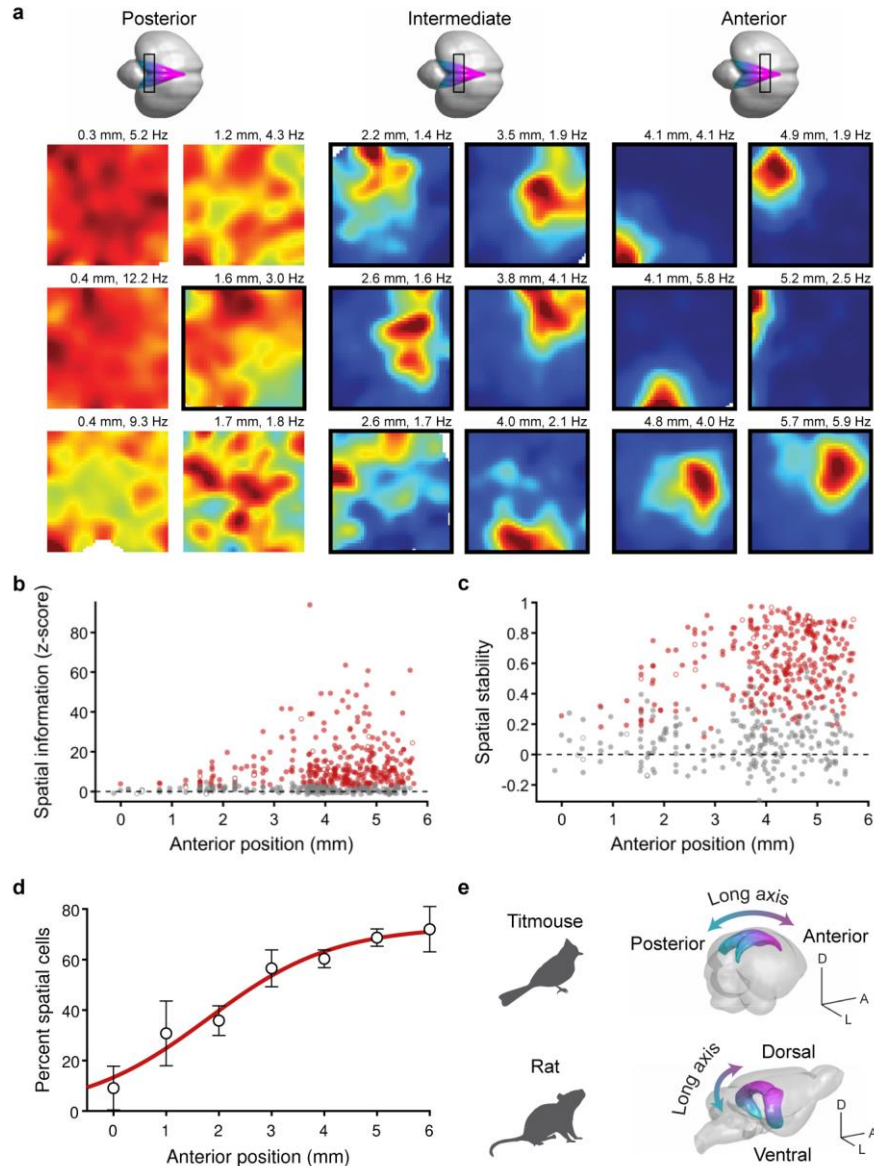

205 **Figure 2: Spatial representations are organized across the long axis of the hippocampus**  
 206 **a**, Example spatial rate maps for excitatory neurons from posterior, intermediate, or anterior hippocampus, plotted as in **Fig. 1**. Place  
 207 cells are outlined in black. The location on the anterior-posterior axis (distance from lambda) is indicated above each map.  
 208 **b**, Spatial information, normalized by taking the z-score of the actual value relative to a shuffled dataset, plotted for all 538  
 209 excitatory cells. Red: place cells; grey: non-place cells; open markers: example cells in **a**.  
 210 **c**, Spatial stability plotted as in **b**.  
 211 **d**, Fraction of excitatory cells that passed place cell criteria binned across anterior position. Error bars: mean  $\pm$  SEM; red line: logistic  
 212 sigmoid function fit.  
 213 **e**, Schematic of the spatial gradient across the hippocampal long axis in tufted titmice and in rats (3D model generated using  
 214 published data<sup>50</sup>). Scale bars 5 mm.

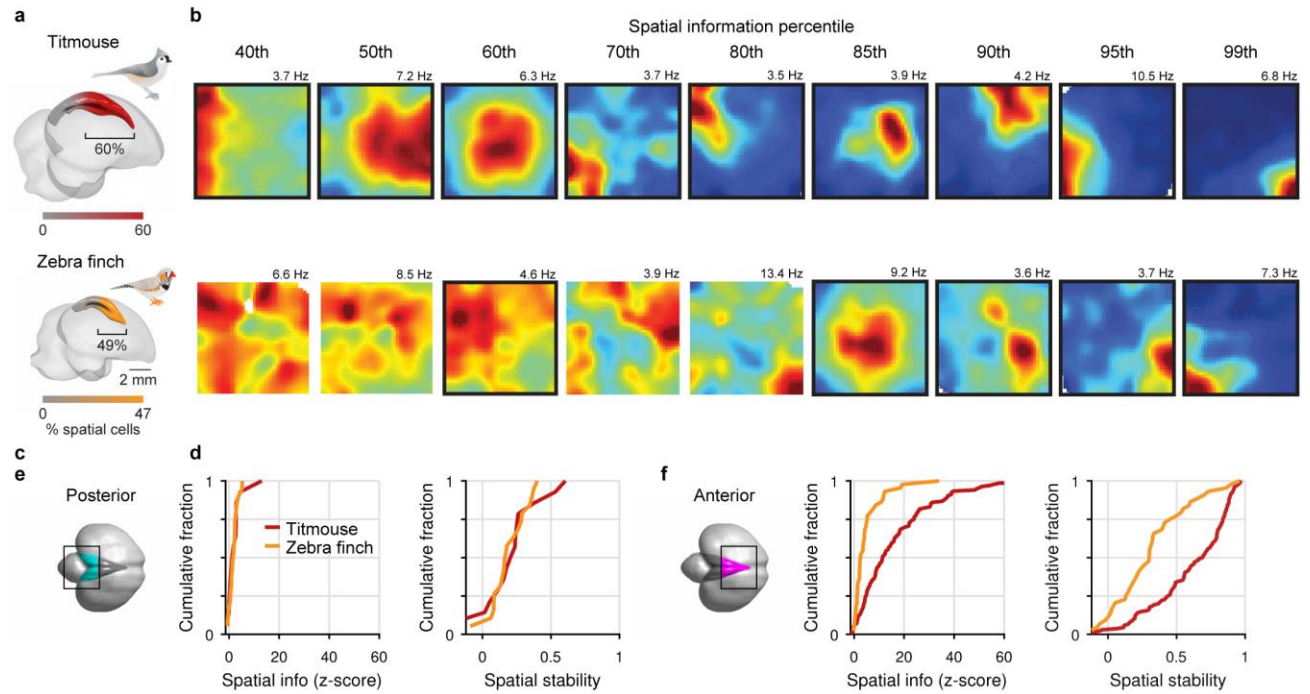

215 **Figure 3: Spatial representations differ across avian species**

216 **a**, Titmouse (top) and zebra finch (bottom) hippocampus colored according to a logistic sigmoid fit to the percent of place cells at  
 217 each anterior position. The bracket indicates the percent of hippocampal length anterior to the inflection point of this fit.

218 **b**, Example spatial rate maps. All cells within the bracketed region in **a** with peak rates >3 Hz were ranked by spatial information, and  
 219 rate maps for the cells corresponding to the given percentiles are shown. Place cells are outlined in black.

220 **c**, Cumulative distributions of normalized spatial information and spatial stability for cells from the posterior hippocampus, as  
 221 defined anatomically (black box; see Methods; n = 14 and 19 for titmouse and zebra finch, respectively).

222 **d**, Same as **c** but for anterior hippocampus (n = 136 and 44, respectively).



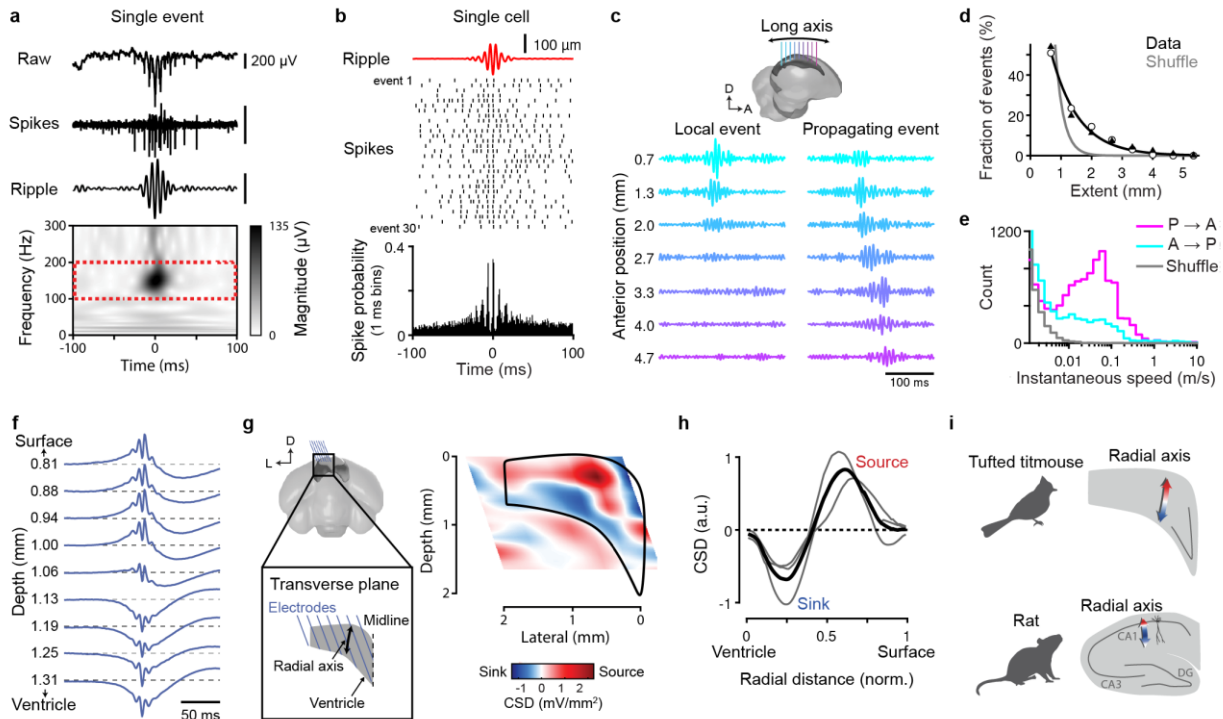

223 **Figure 4: SWRs in the avian hippocampus**

224 **a**, Single SWR in the titmouse hippocampus. Top: raw, spike-band filtered (800–5000 Hz), and ripple-band filtered (100–200 Hz) LFP.  
 225 Bottom: spectrogram of the LFP.  
 226 **b**, Average ripple-band LFP, spike raster from 30 consecutive SWRs, and spike histogram across all detected SWRs for a single cell.  
 227 **c**, Top: schematic of recording configuration across the long axis of the hippocampus. Bottom: two individual SWRs detected on  
 228 multiple electrodes. The “local” event is restricted to a small number of electrodes, whereas the “propagating” event extends over 4  
 229 mm.  
 230 **d**, Distribution of the extent of SWRs across the long axis. Markers: two individual titmice; black line: exponential fit to the mean of  
 231 both birds; grey line: exponential fit to shuffled data.  
 232 **e**, Speed of SWRs propagating in the posterior-to-anterior (P→A) and anterior-to-posterior (A→P) directions, compared to speed for  
 233 a shuffled data set (see Methods).  
 234 **f**, Raw LFP averaged across SWRs for a single electrode at different depths in the titmouse hippocampus.  
 235 **g**, Left: schematic of electrode placement within the transverse plane of the hippocampus.  
 236 Right, 2D CSD map within the transverse plane of the hippocampus (black outline) in one bird.  
 237 **h**, One-dimensional CSD collapsed across the radial axis for three titmice (grey lines: individual birds; black: average). Normalized  
 238 radial distance is 0 at the ventricle and 1 at the dorsal surface of the hippocampus.  
 239 **i**, Layered CSD organization during SWRs in titmouse and in rat<sup>37</sup>. In rat, the primary current sources (red) and sinks (blue)  
 240 correspond to the pyramidal cell layer and the stratum radiatum, respectively. Note that rat CA1 is folded upside down relative to  
 241 the avian hippocampus in stereotaxic coordinates. As a result, sources and sinks are actually reversed in the two species relative to  
 242 the radial axis. This is reminiscent of the inverted laminar organization of the cerebral cortex in mammals compared to other  
 243 amniotes<sup>21</sup>.

## 244 References

- 245 1. Scoville, W. B. & Milner, B. Loss of recent memory after bilateral hippocampal lesions: Memory and memories-  
246 looking back and looking forward. *J. Neurol. Neurosurg. Psychiatry* **20**, 11–21 (1957).
- 247 2. Tulving, E. Episodic and semantic memory. in *Organization of memory* (eds. Tulving, E. & Donaldson, W.) 381–403  
248 (1972). doi:10.1016/B978-0-12-809324-5.21037-7.
- 249 3. O’Keefe, J. & Dostrovsky, J. The hippocampus as a spatial map. Preliminary evidence from unit activity in the  
250 freely-moving rat. *Brain Res.* **34**, 171–175 (1971).
- 251 4. Buzsáki, G., Horváth, Z., Urioste, R., Hetke, J. & Wise, K. High-frequency network oscillation in the hippocampus.  
252 *Science* **256**, 1025–1027 (1992).
- 253 5. O’Keefe, J. & Nadel, L. The hippocampus as a cognitive map. *J. Chem. Inf. Model.* **53**, (1978).
- 254 6. Wilson, M. A. & McNaughton, B. L. Reactivation of hippocampal ensemble memories during sleep. *Science* **265**,  
255 676–679 (1994).
- 256 7. Jadhav, S. P., Kemere, C., German, P. W. & Frank, L. M. Awake hippocampal sharp-wave ripples support spatial  
257 memory. *Science* **336**, 1454–1458 (2012).
- 258 8. Rattenborg, N. C., Martinez-Gonzalez, D., Roth, T. C. & Pravosudov, V. V. Hippocampal memory consolidation  
259 during sleep: A comparison of mammals and birds. *Biol. Rev.* **86**, 658–691 (2011).
- 260 9. Hough, G. E. & Bingman, V. P. Spatial response properties of homing pigeon hippocampal neurons: Correlations  
261 with goal locations, movement between goals, and environmental context in a radial-arm arena. *J. Comp. Physiol.*  
262 *A Neuroethol. Sensory, Neural, Behav. Physiol.* **190**, 1047–1062 (2004).
- 263 10. Kahn, M. C., Siegel, J. J., Jechura, T. J. & Bingman, V. P. Response properties of avian hippocampal formation cells  
264 in an environment with unstable goal locations. *Behav. Brain Res.* **191**, 153–163 (2008).
- 265 11. Ben-Yishay, E. *et al.* Head-direction coding in the hippocampal formation of birds. *bioRxiv* 2020.08.31.274928  
266 (2020) doi:10.1101/2020.08.31.274928.
- 267 12. Van Twyver, H. & Allison, T. A polygraphic and behavioral study of sleep in the pigeon (*Columba livia*). *Exp. Neurol.*  
268 **35**, 138–153 (1972).
- 269 13. Vinepinsky, E. *et al.* Representation of edges, head direction, and swimming kinematics in the brain of freely-  
270 navigating fish. *Sci. Rep.* **10**, 1–16 (2020).
- 271 14. Rodríguez, F. *et al.* Conservation of Spatial Memory Function in the Pallial Forebrain of Reptiles and Ray-Finned  
272 Fishes. *J. Neurosci.* **22**, 2894–2903 (2002).
- 273 15. Sherry, D. F. Food storage by black-capped chickadees: Memory for the location and contents of caches. *Anim.*  
274 *Behav.* **32**, 451–464 (1984).
- 275 16. Clayton, N. S. & Dickinson, A. Episodic-like memory during cache recovery by scrub jays. *October* **395**, (1998).
- 276 17. Krushinskaya, N. Some complex forms of feeding behavior of nutcracker *nucifraga caryocatactes*, after removal  
277 of old cortex. *Z. Evouz. Biochem. Fisiol.* **II**, 563–568 (1966).
- 278 18. Sherry, D. F. & Vaccarino, A. L. Hippocampus and memory for food caches in black-capped chickadees. *Behav.*  
279 *Neurosci.* **103**, 308–318 (1989).
- 280 19. Abellán, A., Desfilis, E. & Medina, L. Combinatorial expression of Lef1, Lhx2, Lhx5, Lhx9, Lmo3, Lmo4, and Prox1  
281 helps to identify comparable subdivisions in the developing hippocampal formation of mouse and chicken. *Front.*  
282 *Neuroanat.* **8**, 59 (2014).
- 283 20. Gupta, S., Maurya, R., Saxena, M. & Sen, J. Defining structural homology between the mammalian and avian  
284 hippocampus through conserved gene expression patterns observed in the chick embryo. *Dev. Biol.* **366**, 125–141  
285 (2012).
- 286 21. Tosches, M. A. *et al.* Evolution of pallium, hippocampus, and cortical cell types revealed by single-cell  
287 transcriptomics in reptiles. *Science* **360**, 881–888 (2018).
- 288 22. Burwell, R. D. & Amaral, D. G. Cortical afferents of the perirhinal, postrhinal, and entorhinal cortices of the rat. *J.*  
289 *Comp. Neurol.* **398**, 179–205 (1998).
- 290 23. Dolorfo, C. L. & Amaral, D. G. Entorhinal cortex of the rat: Topographic organization of the cells of origin of the  
291 perforant path projection to the dentate gyrus. *J. Comp. Neurol.* **398**, 25–48 (1998).
- 292 24. Strange, B. A., Witter, M. P., Lein, E. S. & Moser, E. I. Functional organization of the hippocampal longitudinal axis.  
293 *Nat. Rev. Neurosci.* **15**, 655–669 (2014).
- 294 25. Naumann, R. K. *et al.* The reptilian brain. *Curr. Biol.* **25**, R317–R321 (2015).
- 295 26. Tömböl, T., Davies, D. C., Németh, A., Sebestény, T. & Alpár, A. A comparative Golgi study of chicken (*Gallus*

- 296 domesticus) and homing pigeon (*Columba livia*) hippocampus. *Anat. Embryol. (Berl)*. **201**, 85–101 (2000).
- 297 27. Montagnese, C. M., Krebs, J. R. & Meyer, G. The dorsomedial and dorsolateral forebrain of the zebra finch,  
298 *Taeniopygia guttata*: A Golgi study. *Cell Tissue Res*. **283**, 263–282 (1996).
- 299 28. Sherry, D. F., Vaccarino, A. L., Buckenham, K. & Herz, R. The hippocampal complex of food-storing birds. *Brain*  
300 *Behav Evol* (1989).
- 301 29. Pravosudov, V. V. & Grubb, T. C. Management of fat reserves and food caches in tufted titmice (*Parus bicolor*) in  
302 relation to unpredictable food supply. *Behav. Ecol*. **8**, 332–339 (1997).
- 303 30. Kumar, S. & Hedges, S. B. A molecular timescale for vertebrate development. *Nature* **392**, 917–920 (1998).
- 304 31. Csicsvari, J., Hirase, H., Czurkó, A., Mamiya, A. & Buzsáki, G. Oscillatory coupling of hippocampal pyramidal cells  
305 and interneurons in the behaving rat. *J. Neurosci*. **19**, 274–287 (1999).
- 306 32. Muller, R. U. & Kubie, J. L. The firing of hippocampal place cells predicts the future position of freely moving rats.  
307 *J. Neurosci*. **9**, 4101–4110 (1989).
- 308 33. Jung, M. W., Wiener, S. I. & McNaughton, B. L. Comparison of spatial firing characteristics of units in dorsal and  
309 ventral hippocampus of the rat. *J. Neurosci*. **14**, 7347–7356 (1994).
- 310 34. Smulders, T. V. The avian hippocampal formation and the stress response. *Herpetol. Rev*. **46**, 1 (2015).
- 311 35. Yartsev, M. M., Witter, M. P. & Ulanovsky, N. Grid cells without theta oscillations in the entorhinal cortex of bats.  
312 *Nature* **479**, 103–107 (2011).
- 313 36. Patel, J., Schomburg, E. W., Berényi, A., Fujisawa, S. & Buzsáki, G. Local generation and propagation of ripples  
314 along the septotemporal axis of the hippocampus. *J. Neurosci*. **33**, 17029–17041 (2013).
- 315 37. Ylinen, A. *et al.* Sharp wave-associated high-frequency oscillation (200 Hz) in the intact hippocampus: Network  
316 and intracellular mechanisms. *J. Neurosci*. **15**, 30–46 (1995).
- 317 38. Buzsáki, G. Hippocampal sharp wave-ripple: A cognitive biomarker for episodic memory and planning.  
318 *Hippocampus* **25**, 1073–1188 (2015).
- 319 39. Land, M. F. Eye movements of vertebrates and their relation to eye form and function. *J. Comp. Physiol.* (2014).
- 320 40. Barnes, C. A., McNaughton, B. L., Mizumori, S. J., Leonard, B. W. & Lin, L. H. Comparison of spatial and temporal  
321 characteristics of neuronal activity in sequential stages of hippocampal processing. *Prog. Brain Res*. **83**, 287–300  
322 (1990).
- 323 41. Fiete, I. R., Hahnloser, R. H. R., Fee, M. S. & Seung, H. S. Temporal sparseness of the premotor drive is important  
324 for rapid learning in a neural network model of birdsong. *J. Neurophysiol*. **92**, 2274–2282 (2004).
- 325 42. Babadi, B. & Sompolinsky, H. Sparseness and Expansion in Sensory Representations. *Neuron* **83**, 1213–1226  
326 (2014).
- 327 43. Michael M. Yartsev & Nachum Ulanovsky. Representation of Three-Dimensional Space in the Hippocampus of  
328 Flying Bats. *Science* **340**, 367–373 (2013).
- 329 44. Omer, D. B., Maimon, S. R., Las, L. & Ulanovsky, N. Social place-cells in the bat hippocampus. *Science* **359**, 218–  
330 224 (2018).
- 331 45. Killian, N. J., Jutras, M. J. & Buffalo, E. A. A map of visual space in the primate entorhinal cortex. *Nature* **491**, 761–  
332 764 (2012).
- 333 46. Danjo, T., Toyozumi, T. & Fujisawa, S. Spatial representations of self and other in the hippocampus. *Science* **359**,  
334 213–218 (2018).
- 335 47. Radvansky, B. A. & Dombeck, D. A. An olfactory virtual reality system for mice. *Nat. Commun*. **9**, 1–14 (2018).
- 336 48. Tavares, R. M. *et al.* A Map for Social Navigation in the Human Brain. *Neuron* **87**, 231–243 (2015).
- 337 49. Rolls, E. T., Robertson, R. G. & Georges-François, P. Spatial view cells in the primate hippocampus. *Eur. J. Neurosci*.  
338 **9**, 1789–1794 (1997).
- 339 50. Calabrese, E., Badea, A., Watson, C. & Johnson, G. A. A quantitative magnetic resonance histology atlas of  
340 postnatal rat brain development with regional estimates of growth and variability. *Neuroimage* **71**, 196–206  
341 (2013).

342 **Extended data figures**

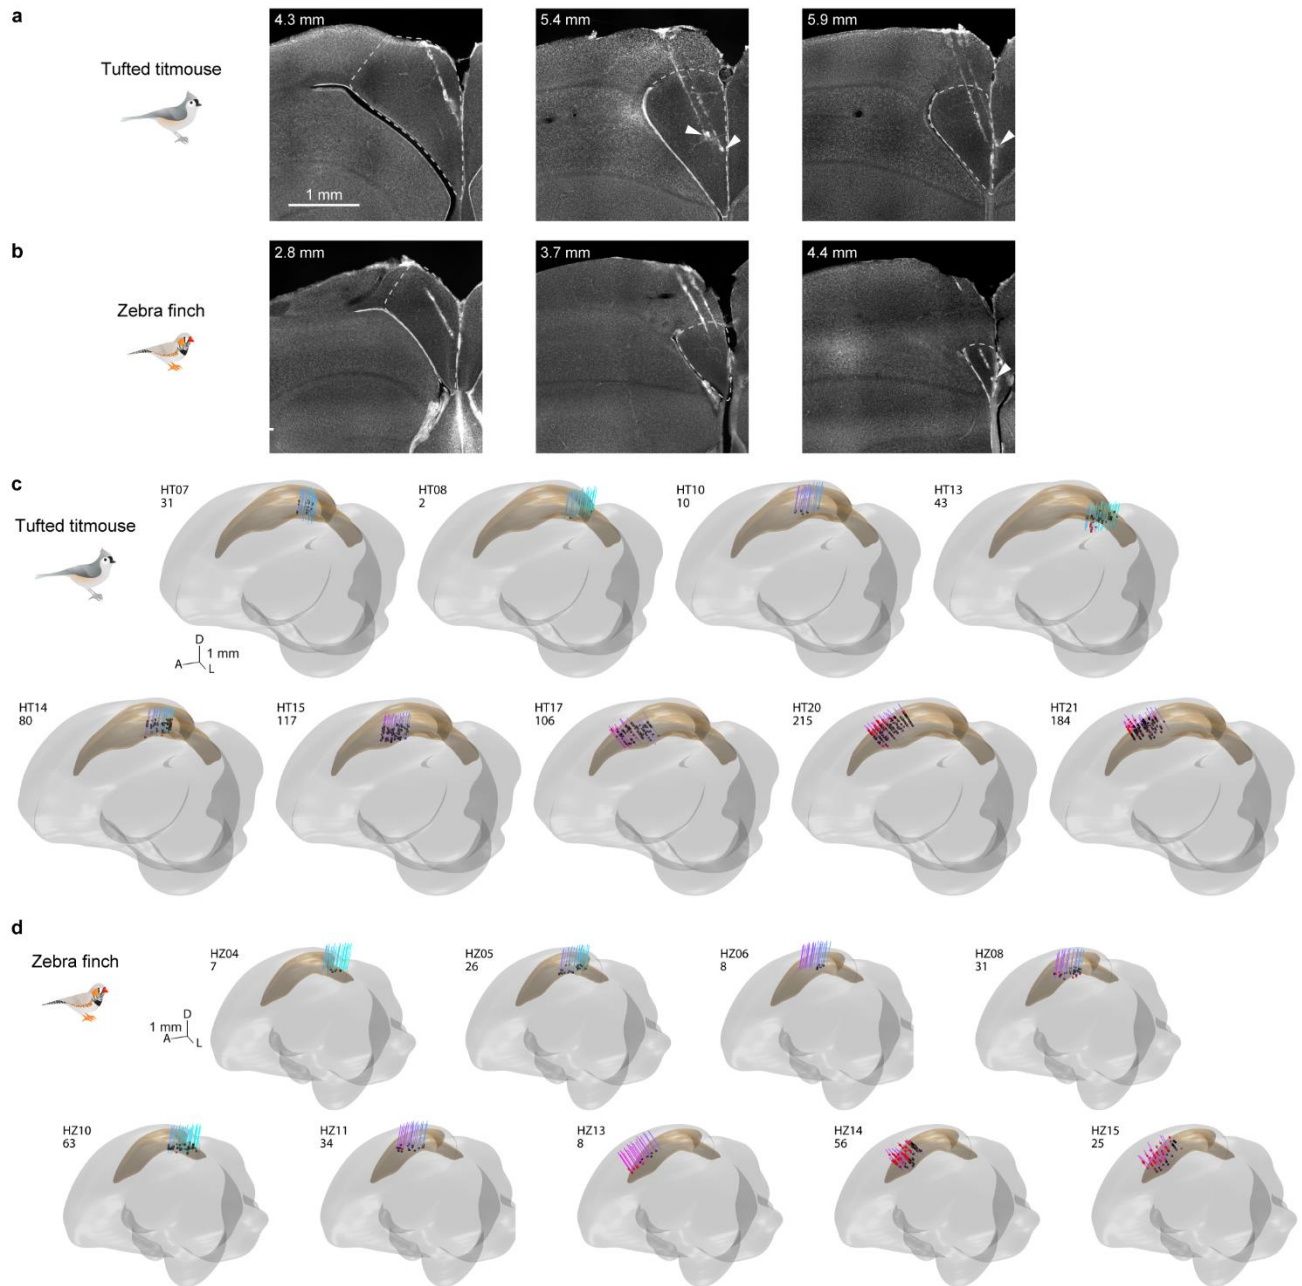

343 **Extended Data Figure 1: Histological mapping of recording locations**

344 **a**, Fluorescent Nissl-stained coronal sections from a titmouse hippocampus. White arrowheads: lesion sites; dashed white:  
345 hippocampus outline. Numbers indicate anterior position relative to lambda.

346 **b**, Same as in **a**, but for the zebra finch hippocampus.

347 **c**, Reconstructed electrode tracks (blue lines, posterior; pink lines, anterior) for all nine titmice that were recorded during the  
348 random foraging task, aligned to a template brain. Grey: template brain; gold: template hippocampus. Black dots: locations of all  
349 cells recorded within the hippocampus; red dots: cells that were likely outside the hippocampus and were excluded from all  
350 analyses. Text indicates bird ID and number of hippocampal neurons recorded.

351 **d**, Same as in **c**, but for zebra finches.

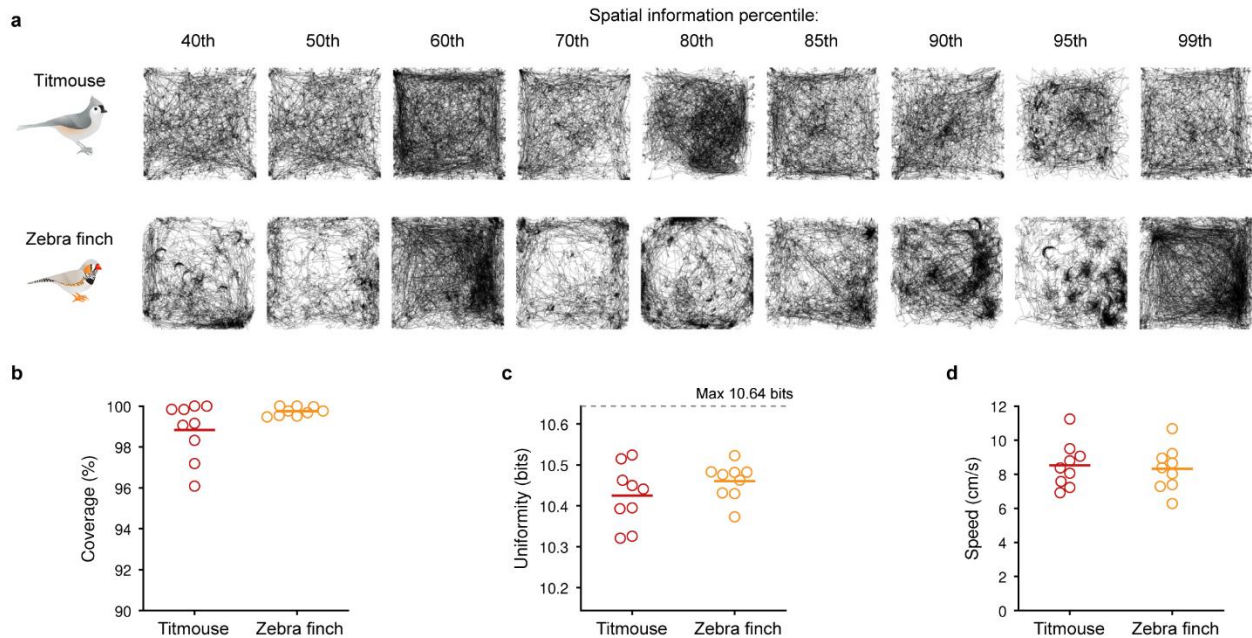

352 **Extended Data Figure 2: Both species achieve good arena coverage in the open field task**

353 **a**, Behavioral trajectories for the sessions corresponding to the rate maps shown in Fig. 3b.

354 **b**, Average coverage, measured as the fraction of bins in the smoothed spatial map bins that were occupied for at least 100 ms, and  
355 were thus included in the quantification of spatial information and spatial stability. Each marker represents the average coverage  
356 across all sessions for a single bird, in this panel and the following. Recording sessions with less than 90% coverage were not  
357 included in any analyses.

358 **c**, Average uniformity of spatial occupancy maps, measured as  $-\sum p_i \log_2(p_i)$ , where  $p_i$  is the probability of occupancy in each  
359 spatial bin  $i$  (out of  $40 \times 40 = 1600$  bins). The maximum possible uniformity is 10.64 bits (for a uniform distribution, where  $p_i = 1/1600$   
360 for every  $i$ ).

361 **d**, Average speed, excluding stationary periods that were cropped from all analyses (see Methods).

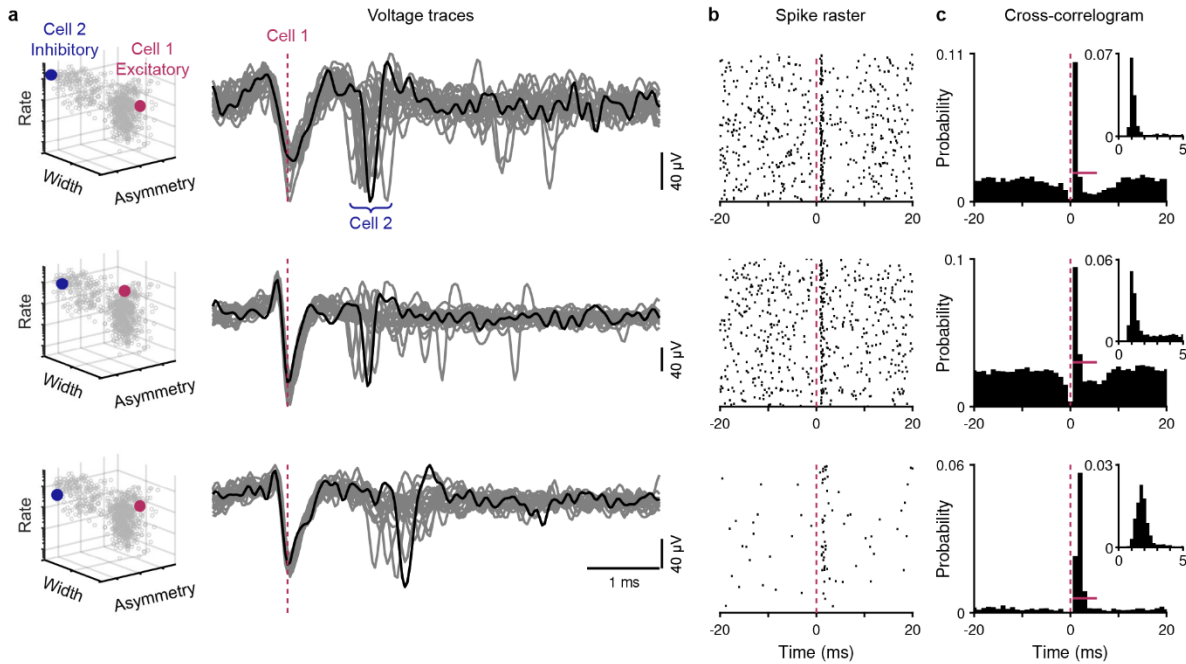

362 **Extended Data Figure 3: Short-latency spike correlations corroborate identity of putative excitatory and inhibitory**  
363 **neurons**

364 **a**, Three pairs of putative excitatory and inhibitory neurons recorded on the same electrode. Left: each cell is highlighted in the plot  
365 of electrophysiological characteristics used to classify all cells as excitatory or inhibitory (replicated from Fig. 1e). Right: 20  
366 consecutive voltage traces, spike-band filtered and aligned to the time of the excitatory cell spike. One example trace is highlighted  
367 in black. Note consistent short-latency responses in the inhibitory cell following excitatory cell spikes.  
368 **b**, Raster plot of the inhibitory cell spike times, aligned to 500 consecutive excitatory cell spikes (pink dashed line).  
369 **c**, Cross-correlogram between spike times in each pair of cells referenced to the excitatory cell (1 ms bins; inset: expanded histogram  
370 with 0.25 ms bins). The peak at positive latency indicates that inhibitory cell spikes tend to tightly follow excitatory cell spikes. The  
371 horizontal pink line designates the time span and threshold level used to assess significance of the putative monosynaptic excitatory  
372 interaction (see Methods). Of all 42 putative excitatory-inhibitory pairs, 24 pairs (57%) had significant excitatory interactions in the  
373  $E \rightarrow I$  direction, whereas none were significant in the  $I \rightarrow E$  direction, in agreement with the putative identification based on waveform  
374 shape and spike rate (Fig. 1e). Additionally, as in mammalian cortex<sup>1</sup>, significant interactions were more likely for  $E \rightarrow I$  pairs than for  
375  $E \rightarrow E$  pairs (5%, 2 of 38 pairs). The average latency for peaks in the cross correlation of significant  $E \rightarrow I$  pairs was 1.7 ms (SD 0.7) ( $n =$   
376 23).

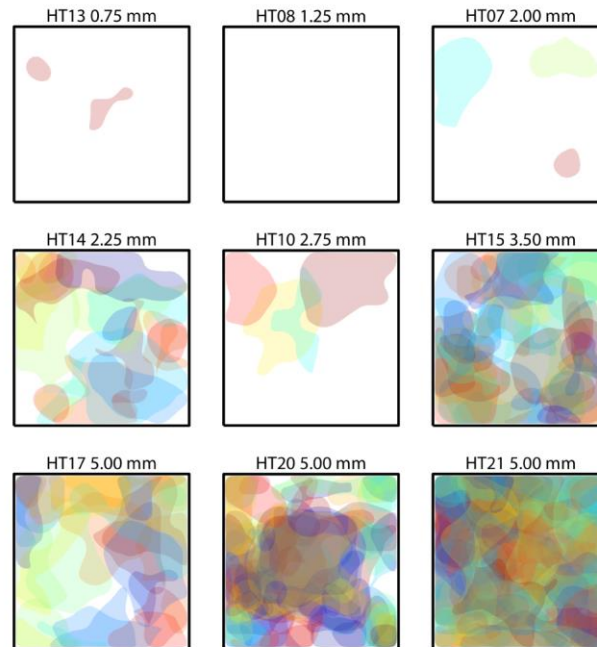

377 **Extended Data Figure 4: Firing fields of hippocampal neurons tile space**  
378 Significant firing fields for every place cell recorded in titmouse during the open field task. Each subpanel shows the fields recorded  
379 from a single bird. Bird ID and the average anterior position of the electrode bundle are indicated. Firing fields were defined as  
380 regions with areas of at least 72 cm<sup>2</sup> (equivalent to a circle with diameter of 10 cm) where firing rate exceeded the 99th percentile of  
381 values for the corresponding bin from shuffled data. The boundary of each field was smoothed with a cubic smoothing spline  
382 (smoothing parameter 0.5). Note that some birds had few or no place cells either because few total cells were recorded and/or they  
383 were implanted at posterior locations. A random color was selected for each cell.

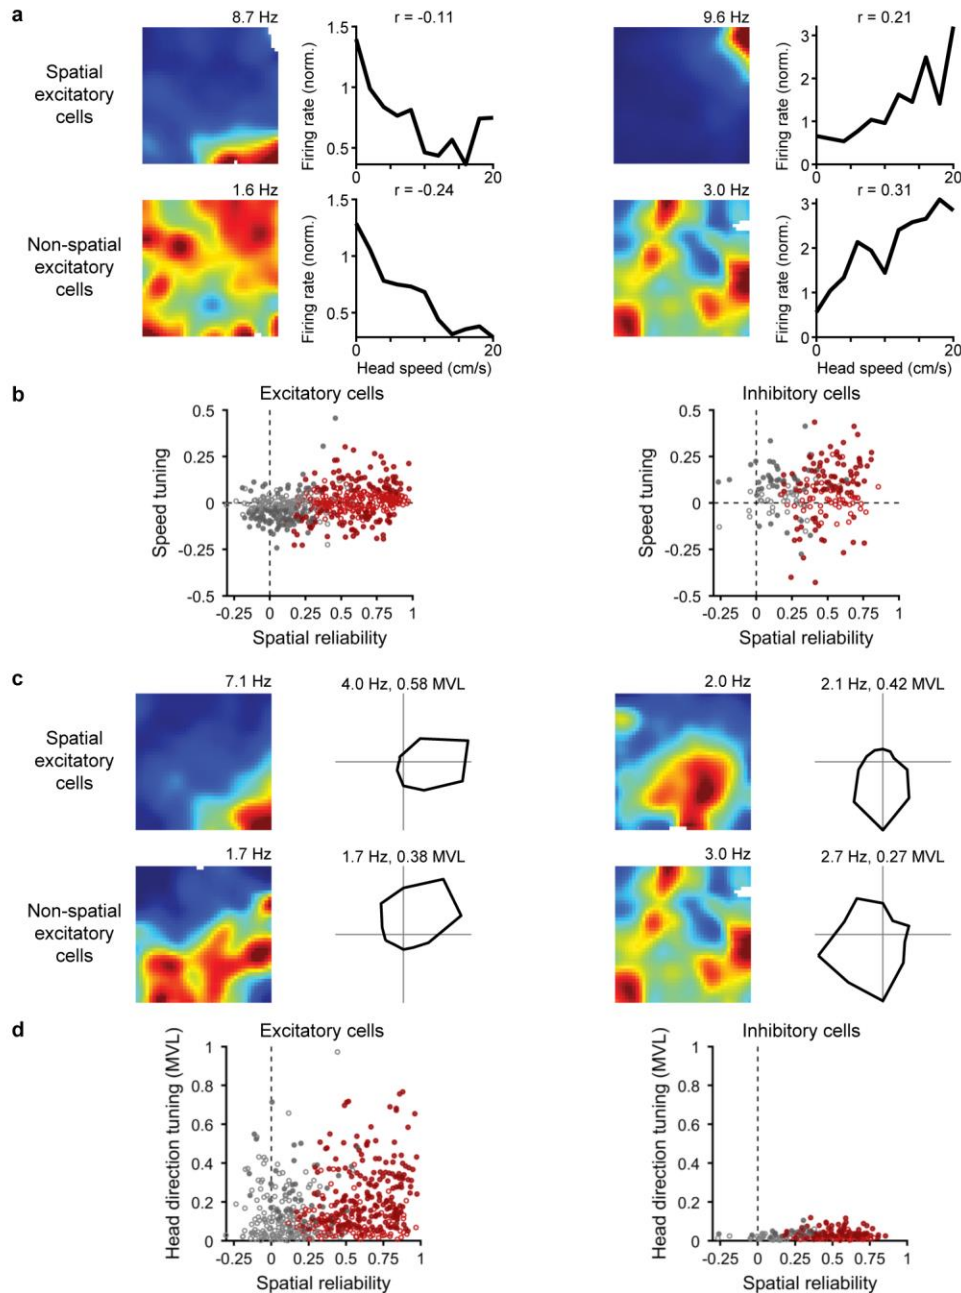

384 **Extended Data Figure 5: Tuning for speed and head direction in the titmouse hippocampus**

385 **a**, Spatial rate maps and speed tuning curves for four example cells. Speed was binned for illustration purposes in these plots only.  
 386 To calculate the speed tuning coefficient ( $r$ , noted above each plot), instantaneous speed was correlated with instantaneous firing  
 387 rate. Top: place cells; bottom: non-place cells. Left: cells with negative correlation between speed and firing rate; right: cells with  
 388 positive correlation.

389 **b**, Population summary of speed tuning compared to spatial stability for excitatory and inhibitory cells. Red: place cells; grey: non-  
 390 place cells; filled circles: significant speed tuning. Speed tuning was positively correlated with spatial tuning in excitatory cells; that  
 391 is, cells that were less spatially reliable were more likely to have negative speed tuning, whereas cells that were more spatially  
 392 reliable were more likely to have positive speed tuning ( $r = 0.28$ ,  $p < 10^{-10}$ ). This correlation did not reach significance for inhibitory  
 393 cells ( $r = 0.12$ ,  $p = 0.09$ ). Overall 15% of excitatory cells were positively correlated with speed and 27% were negatively correlated ( $n$   
 394  $= 538$ ). For inhibitory cells, 48% were positively correlated with speed and 12% were negatively correlated ( $n = 217$ ).

395 **c**, Spatial rate maps and head direction tuning plots for four example cells. Top: place cells; bottom: non-place cells. Maximum firing  
 396 rate of the polar plot and the strength of head direction tuning measured by the mean vector length (MVL) are noted above (see  
 397 Methods).



398 **d**, Population summary of head direction tuning compared to spatial stability for excitatory and inhibitory cells. Colors as in **b**. MVL  
399 was correlated with spatial stability in excitatory cells ( $r = 0.21$ ,  $p < 10^{-5}$ ); this relationship did not reach significance for inhibitory  
400 cells ( $r = 0.13$ ,  $p = 0.052$ ). Overall, 49% of excitatory cells ( $n = 522$ ) and 45% of inhibitory cells ( $n = 210$ ) had significant head direction  
401 tuning. Note that head angle was not available for a small number of recordings (16 excitatory and 7 inhibitory cells).

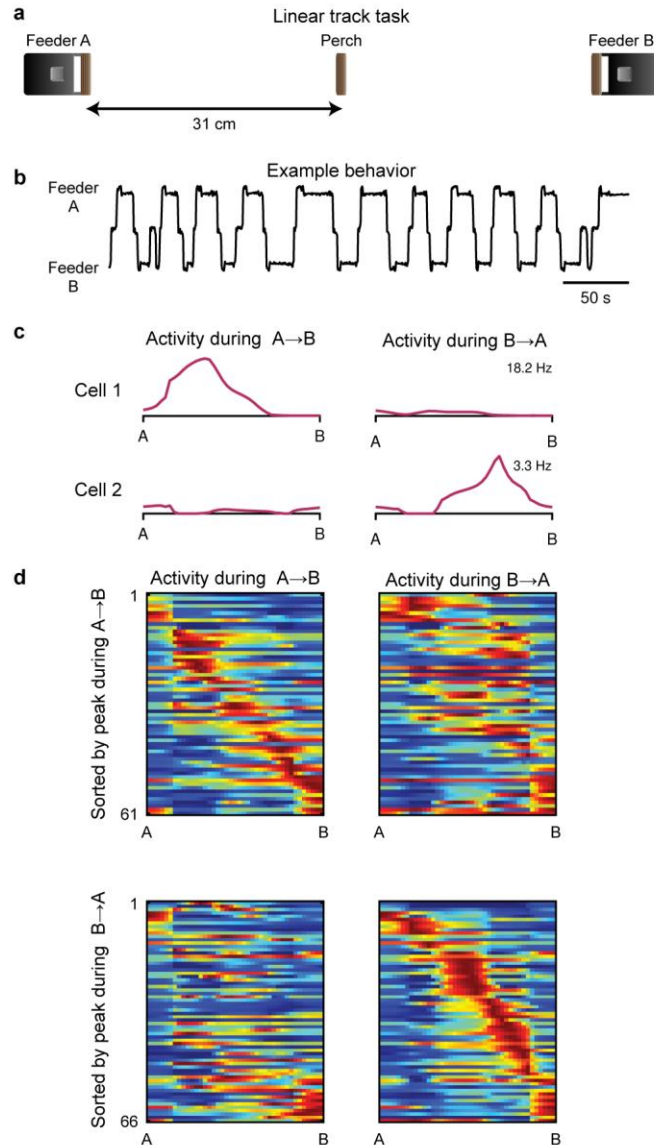

402 **Extended Data Figure 6: Directionally-selective place cells on a linear track**

403 **a**, Schematic of task design. Three perches were arranged in a line, with motorized feeders at each end. Titmice learned to rapidly  
404 alternate between the two feeders over several days of training.

405 **b**, Example behavioral trajectory.

406 **c**, Firing rate as a function of position along the track for two example cells. One-dimensional rate maps were calculated separately  
407 for each direction of travel. The peak firing rate for each cell is indicated. Note direction selectivity.

408 **d**, One-dimensional rate maps for all excitatory cells recorded on the linear track. Each row represents a single cell. Left and right  
409 columns show rate maps calculated for movement during each of the two directions. Color scale: blue, 0 Hz; red: 99th percentile of  
410 firing rate. Top: only cells that had significant firing fields in the A→B direction (n = 61 of 105), sorted by the location of the peak in  
411 the firing rate map for that direction. Bottom: only cells that had significant firing fields in the B→A direction (n = 66 of 105), sorted  
412 by the location of the peak in the firing rate map for that direction. Of the 105 cells, 49 had significant firing fields in both directions.

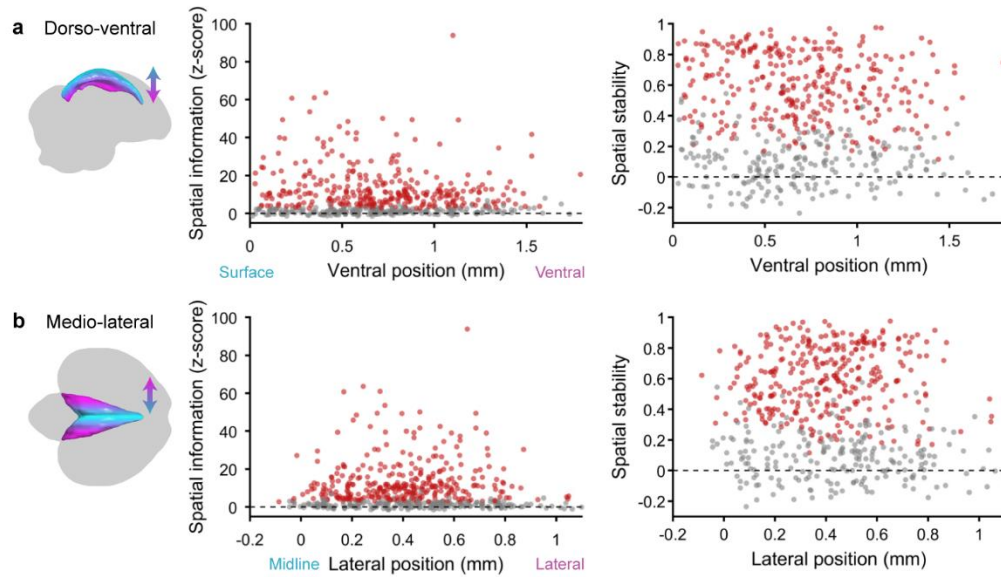

413 **Extended Data Figure 7: Lack of spatial tuning gradients across the dorso-ventral and medio-lateral axes of the**  
414 **titmouse hippocampus**

415 **a**, Spatial information and spatial stability plotted against ventral position, measured relative to the dorsal-most position of the  
416 hippocampus in each coronal section. Colors as in **Fig. 2 b,c**.

417 **b**, Spatial information and spatial stability plotted against the lateral position of the recording, measured relative to the midline.  
418 Some cells have negative medio-lateral positions due to variations of hippocampal shape relative to the template brain.

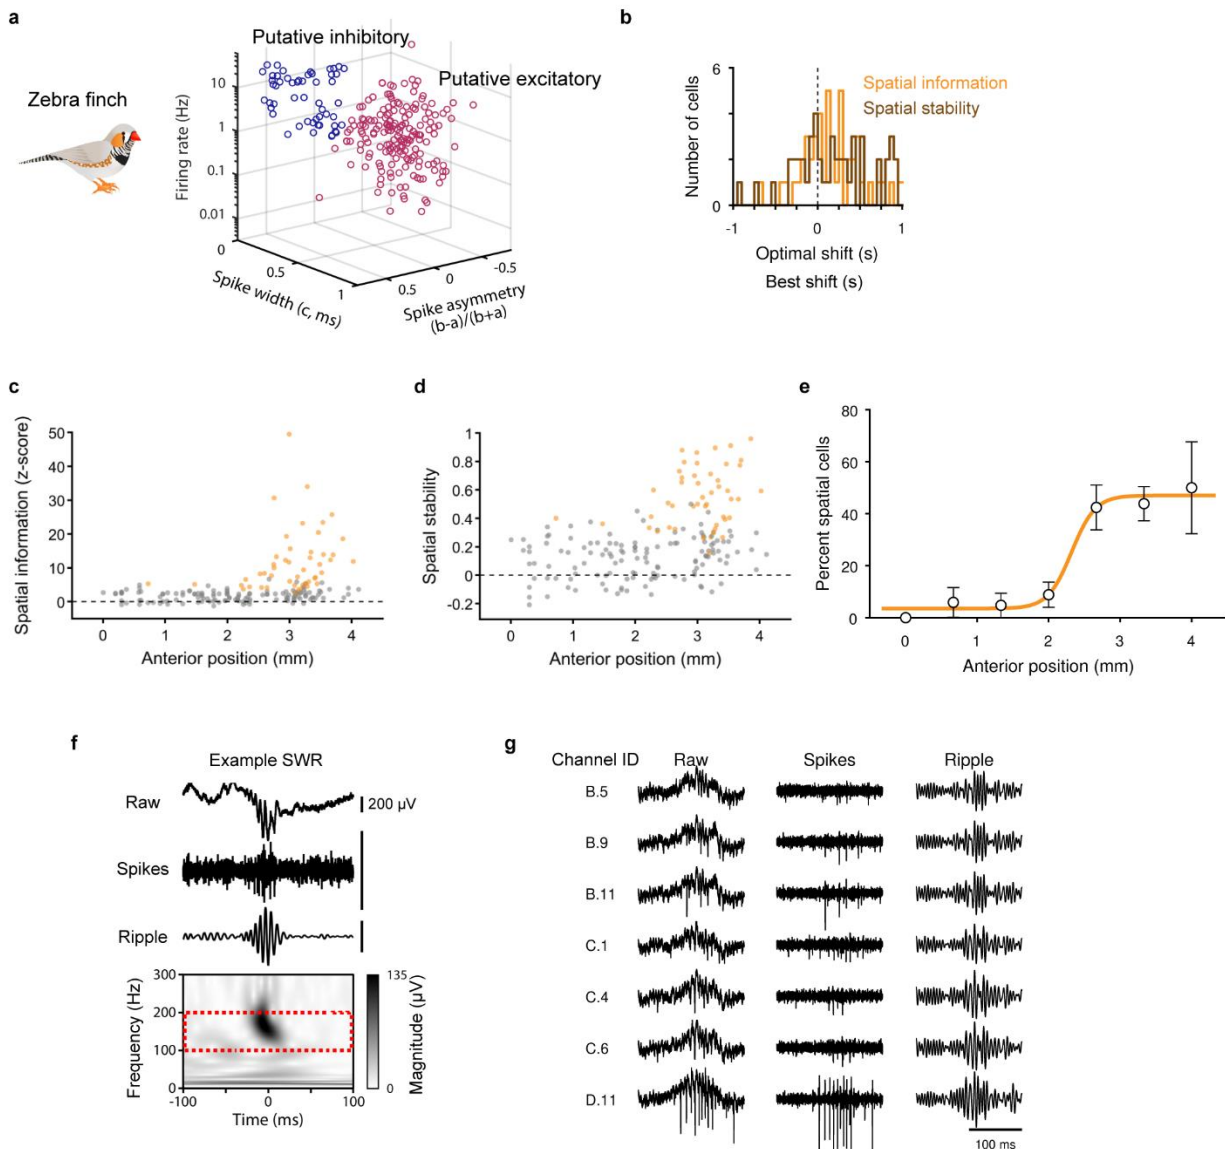

419 **Extended Data Figure 8: Spatial tuning and SWRs in the zebra finch hippocampus**

420 Results in the zebra finch, similar to those shown in the main figures for the titmouse.

421 **a**, Putative excitatory ( $n = 179$ ) and inhibitory cells ( $n = 59$ ) during the open field task, as in **Fig. 1e**.

422 **b**, Optimal time shifts for spatial information and spatial stability, as in **Fig. 1g**, bottom (mean optimal shift 144 ms and 166 ms,  
423 respectively; both greater than zero,  $p = 0.005$  and  $0.012$ , two-sided t-test,  $n = 47$  and  $n = 48$ ).

424 **c,d** Normalized spatial information and spatial stability increased with anterior position ( $p = 0.013$  and  $p = 0.0007$ , respectively,  
425 likelihood ratio test of linear mixed effects model), as in **Fig. 2b,c**.

426 **e**, Fraction of place cells as a function of anterior position, as in **Fig. 2d**.

427 **f**, Example SWR, as in **Fig. 4a**.

428 **g**, Example SWR recorded across seven contacts of a silicon probe in the zebra finch hippocampus. Recordings are from three probe  
429 shanks, with inter-shank spacing of  $200\ \mu\text{m}$ . Shank (B, C, D) and contact number are noted.

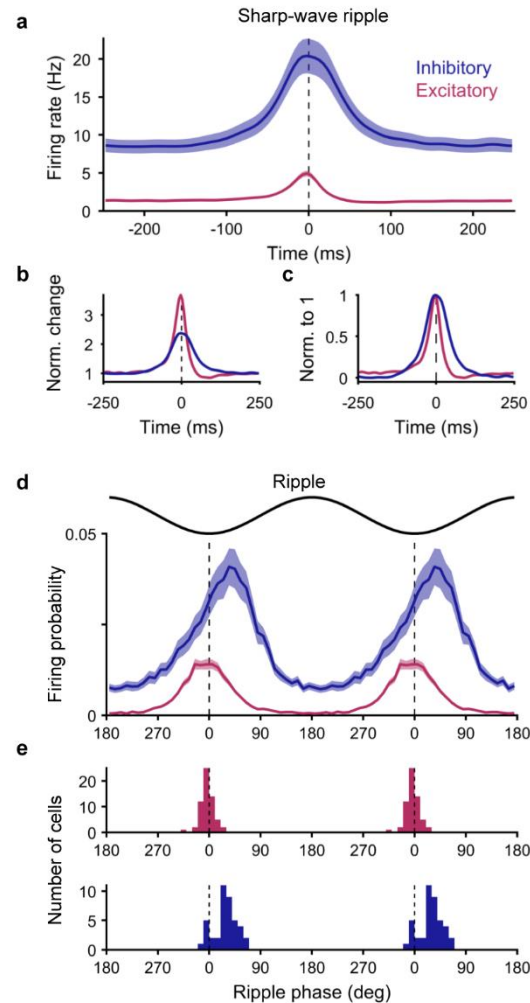

430 **Extended Data Figure 9: Modulation of spiking in excitatory and inhibitory neurons during SWRs**

431 **a**, Average firing rate of excitatory ( $n = 65$ ) and inhibitory ( $n = 43$ ) neurons during SWRs in sleeping titmice. Both excitatory and  
432 inhibitory neurons increased their firing during SWRs, as in rodents<sup>2</sup>. Error bars: mean  $\pm$  SEM.

433 **b**, Same as in **a**, but normalized by the average baseline firing rate from  $\pm 150$ – $250$  ms. As in rodents<sup>2</sup>, excitatory cells showed a  
434 larger proportional increase in firing rate than inhibitory cells (3.7- and 2.4-fold, respectively).

435 **c**, Same as in **a**, but normalized from 0 to 1. As in rodents<sup>2</sup>, inhibitory cells showed broader temporal activation. This could  
436 potentially arise from a combination of unidentified subclasses of inhibitory cells.

437 **d**, Average firing probability of all excitatory and inhibitory neurons across phases of the ripple cycle. Only spikes occurring during  
438 the SWR, defined as the period over which the ripple envelope exceeded two standard deviations of baseline, were included. For  
439 visualization only, the result was duplicated and concatenated across two ripple cycles. Error bars: mean  $\pm$  SEM.

440 **e**, Histogram of preferred ripple phase for excitatory (top) and inhibitory (bottom) cells. Preferred phase was determined by fitting a  
441 sine wave to the ripple-aligned spike probability histogram for each cell. Only cells with significant fits were included in this panel.

442 Excitatory cells reliably fired near the trough of the ripple (mean  $-3.1^\circ$ ), whereas inhibitory cells tended to fire after the trough ( $27.6^\circ$ ;  
443 difference between excitatory and inhibitory  $p < 10^{-15}$ ), similar to rodents<sup>2</sup>.

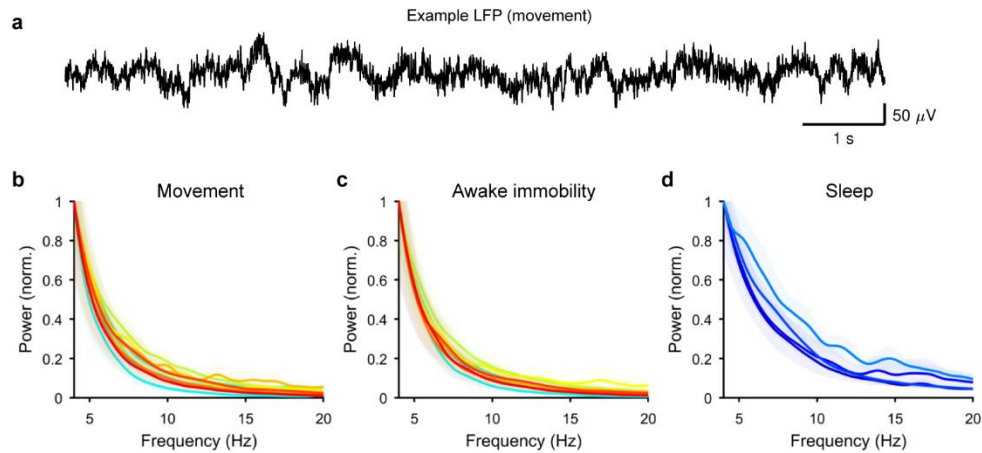

444 **Extended Data Figure 10: Lack of evidence for theta oscillations in the bird hippocampus**

445 **a**, Typical example of raw LFP during the open field task, low-pass filtered at 100 Hz to remove spikes.

446 **b**, Power spectra of the LFP during movement in the open field task. Each line represents the average power spectrum for a single  
447 bird ( $n = 9$  titmice, error bars: mean  $\pm$  SEM across sessions).

448 **c**, Periods of immobility in the open field task, plotted as in **b**.

449 **d**, Recordings during sleep, plotted as in **b** ( $n = 4$  titmice).

## 450 **Methods**

### 451 **Subjects**

452 All animal procedures were approved by the Columbia University Institutional Animal Care and Use Committee and  
453 carried out in accordance with the US National Institutes of Health guidelines. Subjects were 15 adult tufted titmice  
454 (*Baeolophus bicolor*, collected from multiple sites in New York State using Federal and State permits) and 11 adult zebra  
455 finches (*Taeniopygia guttata*, Magnolia Farms). The open field experiments include data from 9 tufted titmice (5 female,  
456 4 male) and 9 zebra finch (all male). The linear track experiment includes data from 3 tufted titmice (all female). SWRs  
457 were analyzed during sleep in 4 tufted titmice (2 female, 2 male) and 2 zebra finches (1 female, 1 male). Finally, one  
458 subject of each species was used to construct a 3D model of the brain and hippocampus. There is no visible sexual  
459 dimorphism in tufted titmice, so experiments were blind to sex, which was determined after perfusion. Only male zebra  
460 finches were used because they are generally larger, and more easily support the weight of the microdrive and cable  
461 during open field behavior. All birds were singly housed and subject to a “winter” light cycle, 9h:15h light:dark. Random  
462 foraging and linear track experiments were run during the light ON period, and SWR recordings during sleep were run  
463 during the light OFF period. Primary wing feathers were trimmed to prevent flight.

### 464 **Behavioral experiments**

465 Experiments in awake birds were conducted in an enclosed square arena, with a central open space 61 cm on each side,  
466 partially surrounded by a 2.5 cm boundary interrupted by corner posts. The walls, floor, and ceiling were black, with ~15  
467 cm diameter bright shapes (yellow circle, pink star, blue pentagon, and green tree) positioned on each wall, centered  
468 ~30 cm above the floor. The arena was illuminated from above. White noise was played in the background to mask  
469 inadvertent room noises. Position was tracked using an infrared motion-tracking system (Qualisys) at 300 frames/s.  
470 Sessions typically lasted 1 hour, and each bird was run once per day.

471 To motivate consumption of seeds during the open field and linear track tasks, birds were deprived of food from the time  
472 of light onset until the start of the experiment. Birds were weighed daily before the experiment. The time period of food  
473 deprivation after light onset ranged from 1–5 hours, adjusted to achieve stable weight.

474 In the random foraging task, small sunflower seed fragments (2.5 mg, for titmice) or millet seeds (1.3 mg, for zebra finch)  
475 were automatically released from above by a custom-built automatic seed dispenser. These food items were dropped  
476 from a sufficient height (110 cm) that they scattered randomly and virtually uniformly after hitting the floor. The rate of  
477 the seed dispenser was adjusted to roughly match the pace at which the birds consumed seeds. Birds typically underwent  
478 3–6 habituation sessions, some conducted before surgery and some afterwards. Electrophysiological recordings began  
479 after these sessions.

480 In the linear track task, two custom-built feeders were positioned at opposite corners of the arena. These feeders were  
481 equipped with motion sensors to detect when the bird retrieved a seed. When a seed was retrieved from one feeder,  
482 that feeder closed and the other feeder opened. Birds were motivated to alternate between the feeders, and reliably  
483 learned to do so after several days of pre-training.

484 For recordings of SWRs during sleep, birds were recorded in the dark in a smaller chamber with a central perch, placed  
485 inside the larger arena. The bird was monitored with an infrared video camera. It was considered asleep when it exhibited  
486 characteristic fluffed feathers, head tucked under a wing, and lack of motion. Several recording sessions of 1 hour each  
487 were conducted consecutively each night, with incremental advancement of the electrodes before each session.

### 488 **Electrophysiology**

489 Neural recordings were obtained using custom miniature microdrives. Each microdrive contained an array of platinum-  
490 iridium microelectrodes (Microprobes PI20035.OA3 and PI20031.OA3). Twenty-one electrodes with 5 MOhm impedance  
491 were used for random foraging and linear track experiments, and 7–13 electrodes with 1 MOhm impedance were used

492 for recordings during sleep. (For recordings during sleep in one zebra finch (Extended Data Fig. 8g), a silicon probe  
493 (Cambridge NeuroTech, ASSY-236F) was used instead.) Each microelectrode was guided through polyimide tubes (ID  
494 0.004", OD 0.055"; Nordson medical #141-0001) arranged in a bundle. The electrodes were then soldered to a flexible  
495 cable attached to a moveable shuttle, allowing the bundle of electrodes to be advanced into the brain by turning a single  
496 screw (size M1.2-0.25 x 10mm). Typically, the drive was advanced immediately before each recording session by 1/8th  
497 or 1/4th of a full 250  $\mu$ m turn. A protective housing was built using 3D printed polymer and transparency film and shielded  
498 using conductive paint (Ted Pella, 16062). The dimensions of the microdrive were 12 mm wide  $\times$  6 mm deep  $\times$  24 mm  
499 high, and the total weight including cement was typically 1.8 g for titmice and 1.6 g for zebra finches. Passive IR-reflective  
500 markers for motion tracking added 0.6 g for titmice and 0.2 g for zebra finches.

501 Signals were referenced to a platinum-iridium wire (0.002" diameter bare, 0.004" coated, AM Systems 776000) implanted  
502 outside of the hippocampus in the same hemisphere. A silver ground wire (0.005" diameter bare, AM Systems 781500)  
503 was implanted in the opposite hemisphere.

504 Signals were amplified, multiplexed, and digitized at 30,000 samples/s within the microdrive housing using an interface  
505 chip (Intan Technologies, LLC; RHD2164) wire-bonded onto a custom PCB. Digital signals were then transmitted from the  
506 bird to a computer interface board via a 12-conductor SPI cable (Intan technologies, LLC; C3213), with outer sheathing  
507 stripped to reduce weight. The effective weight of the cable was further reduced by attaching a thin piece of very elastic  
508 material to either end (Linsoir Beads, Crystal String). A motorized commutator (Doric Lenses, Inc., AERJ\_24\_HDMI)  
509 allowed the bird to turn freely.

## 510 Surgery

511 Birds were anesthetized using 1.5% isoflurane in oxygen and injected intraperitoneally with dexamethasone (2 mg/kg).  
512 Feathers were removed from the surgical site, and birds were placed in a stereotaxic apparatus using ear bars and a beak  
513 clamp. To anchor the microdrive, 4–6 partial craniotomies through the outer layer of the skull were filled with light-cured  
514 dental cement (Pentron Clinical, N11H). A full craniotomy and durotomy were made above the hippocampus at the  
515 recording locations noted in the text. For two birds in which SWRs were recorded across the transverse plane, electrodes  
516 were implanted 3 mm anterior to lambda. All microdrives were implanted into the left hippocampus, tilted to the left by  
517 20° in order to target the medial hippocampus while avoiding the large blood vessel over the midline. For most birds, the  
518 brain was tilted such that the angle of the groove at the base of the upper mandible of the beak was 65° relative to the  
519 horizontal. For the anterior-most recording locations (titmice HT17, HT20, HT21 and zebra finch HZ13, HZ14, and HZ15  
520 in Extended Data Fig. 1c,d), electrodes were implanted with the brain tilted up by an additional 30° to allow more direct  
521 access to the hippocampus, which is located below the surface of the brain in this anterior region. Buprenorphine (0.05  
522 mg/kg) was injected intraperitoneally after the surgery.

## 523 Histology

524 After completion of the experiment, electrode locations were marked by passing 30  $\mu$ A negative current for either 1 s or  
525 5 s through each electrode. Animals were given an overdose of ketamine and xylazine and were then perfused  
526 transcardially with saline followed by 4% formaldehyde. Brains were extracted and stored in 4% formaldehyde, then cut  
527 into 100  $\mu$ m-thick coronal sections. Brain sections were either stained with fluorescent Nissl stain (Invitrogen N21480),  
528 fluorescent DAPI (Invitrogen D1306), or left unstained. For the three titmice and three zebra finches that had microdrives  
529 implanted in very anterior hippocampus, where the hippocampus is submerged below the dorsal surface of the brain  
530 (birds HT17, HT20, HT21, HZ13, HZ14, and HZ15 in Extended Data Fig. 1c,d), as well as for the two titmice in which SWRs  
531 were recorded across the transverse axis, the position of each electrode relative to the boundary of the hippocampus  
532 was reconstructed using lesion sites and electrode tracks. This reconstruction was used to determine which recorded  
533 cells were likely outside the hippocampus; these cells were thereby excluded. For other birds, the stereotaxic coordinates  
534 of the implant site were registered to a template brain, and the small number of cells that were estimated to be outside  
535 the hippocampus were excluded (Extended Data Fig. 1c,d).



536 To facilitate both surgical planning and registration of final recording locations, we constructed template brains  
537 containing a 3D reconstruction of the hippocampus aligned to stereotaxic coordinates. For each species, stiff wire (Malin  
538 Co., 0.006" music wire) was inserted into the brain horizontally at two locations during surgery. Stereotaxic coordinates  
539 of both locations were recorded. The brain was then sectioned sagittally. The outline of the hippocampus and the whole  
540 brain was traced in each section using Matlab and Illustrator. Visible holes made by the wire allowed registration of  
541 sections to each other and to stereotaxic coordinates.

542 Compared to neighboring regions, the hippocampus in birds has a lower density of cells and larger cell bodies, making  
543 the identification of hippocampal boundaries unambiguous<sup>3</sup>. This definition of the hippocampus in birds appears to be  
544 homologous to the hippocampus proper in mammals, i.e. Ammon's horn and the dentate gyrus, based on genetic  
545 analysis<sup>4-6</sup>.

## 546 Behavioral analysis

547 Titmouse behavior was tracked using a rigid arrangement of infrared-reflective markers connected to the microdrive,  
548 which allowed 6DOF tracking of head position by the software QTM (Qualisys). For the analyses in Figs. 1 and 2, the  
549 location of the titmouse was defined as the midpoint between the eyes projected onto the floor of the arena. The location  
550 of the midpoint between the eyes was determined by measuring the positions of the markers relative to the eyes of the  
551 bird, either during surgery or after perfusion. For zebra finches, only a single marker was affixed at the top of the  
552 microdrive in order to reduce the weight of the implant. The position of this marker projected onto the floor was used  
553 as the position of zebra finch in the open field arena. For direct comparisons between titmice and zebra finch (Fig. 3), an  
554 equivalent position relative to the microdrive was used as the position of the titmouse in the arena.

555 Movement speed was calculated by first smoothing  $x$  and  $y$  position separately with a 1-s moving average, then  
556 differentiating each and calculating absolute speed as  $\sqrt{dx^2 + dy^2} / dt$ . This smoothing window was chosen to reduce  
557 the influence of head movements, and to instead capture locomotion through the arena. We excluded stationary periods  
558 when the speed fell below 5 cm/s for longer than 5 s from all analyses of spatial tuning and head direction tuning.

## 559 Spike sorting

560 Single units were identified using Plexon spike sorting software. Raw signals from individual electrodes were first high-  
561 pass filtered using a 4-pole Butterworth filter at 250 Hz. Candidate waveforms were thresholded, projected into 2D or  
562 3D PCA space, and then sorted into putative single units using template sorting. For display purposes, spike waveforms  
563 and voltage traces shown in the figures were band-pass filtered from 800–5000 Hz (Hamming window FIR filter).

## 564 Identification of excitatory and inhibitory neurons

565 All analyses were conducted in MATLAB. Putative excitatory and inhibitory neurons were identified by applying k-means  
566 clustering with two clusters to the electrophysiological characteristics described in Fig. 1e. Spike width was calculated as  
567 the time from the trough of the average spike waveform to the subsequent peak. Peak amplitude asymmetry was  
568 calculated as the relative height of the two positive peaks flanking the trough (Fig. 1e)<sup>7</sup>. This measure equals -1 when  
569 the first peak is present and the second is non-existent, 0 when the two peaks are equal, and +1 when the second peak  
570 is present and the first is non-existent. Mean firing rate was 1.2 Hz and 11.5 Hz in the putative excitatory and inhibitory  
571 clusters, respectively; spike width was 0.60  $\mu$ s and 0.31  $\mu$ s; and peak amplitude asymmetry was -0.21 and +0.47.

572 We further assessed our criteria for classifying excitatory and inhibitory neurons by examining spike trains of pairs of  
573 neurons recorded on the same electrode. Putative monosynaptic connections between neurons have been inferred using  
574 cross-correlograms of spike times<sup>1,8</sup>. For each pair of cells, we constructed the cross-correlation between spike trains  
575 binned to 1 ms resolution with time lags of  $\pm 20$  ms. Only cells with at least 1000 spikes were included. To test for  
576 significance, we also constructed jittered cross-correlograms by shifting each spike time by a random value drawn from  
577 a uniform distribution in the interval  $\pm 5$  ms. This interval was intended to preserve slower, non-monosynaptic spike time

578 correlations, such as those arising from common input. Our spike sorting method precluded detection of spikes from two  
579 different neurons recorded on the same electrode within  $\sim 1$  ms of each other, so any spikes from the two neurons that  
580 fell within the same 1 ms bin were re-jittered until there were no such overlaps. The maximum value of the jittered cross-  
581 correlogram within the interval from 1 ms to 4 ms was stored, and this process was repeated 500 times to create a null  
582 distribution. A putative excitatory monosynaptic connection was considered significant if there was a peak in the actual  
583 cross-correlogram within the 1-4 ms interval, and if this peak ms exceeded 99% of the null-distribution values. We only  
584 assessed putative excitatory connections because the cross-correlogram technique is much more sensitive to excitatory  
585 interactions than inhibitory ones<sup>9</sup>.

586 Unless otherwise specified in the text (e.g. Fig. 1 d-f, Extended Data Fig. 5, Extended Data Fig. 9), all analyses were  
587 conducted on excitatory cells only.

## 588 Analysis of spatial activity in the random foraging task

589 Spatial firing rate maps were constructed to capture the relationship between neural activity and spatial location. The  
590 arena was divided into a grid of 40×40 bins. For each neuron, spike counts and occupancy time in each bin were  
591 calculated, and the resulting matrices were separately smoothed with a 13×13-point Hamming window. Any bin with less  
592 than 0.1 s occupancy after smoothing was replaced with “Not a number” (NaN). Any cell with poor coverage, defined as  
593 more than 10% of the arena occupied by NaN, was excluded from further analysis. We also excluded cells for which the  
594 total distance travelled during the recording was less than 50 m. Finally, spike counts were divided by occupancy to yield  
595 mean firing rates in each bin.

596 We quantified the degree of spatial tuning for each neuron in two ways. First, we calculated the amount of information  
597 about position conveyed by firing rate according to:

$$598 \quad I = \sum_x \frac{\lambda(x)}{\lambda} \log_2 \frac{\lambda(x)}{\lambda} p(x)$$

599 where  $I$  is the information rate in bits/spike,  $x$  is the spatial bin,  $p(x)$  is the probability that the bird occupies bin  $x$ ,  $\lambda(x)$   
600 is the mean firing rate in bin  $x$ , and  $\lambda = \sum \lambda(x)p(x)$  is the overall mean firing rate<sup>10</sup>. Higher information rates arise from  
601 sparser spatial rate maps, indicating that each spike is highly informative about position. Because spuriously high spatial  
602 information values can arise from cells that only fire a small number of spikes, spatial information was normalized by  
603 taking the z-score relative to the distribution for a shuffled dataset (see below).

604 Second, we calculated the stability of the spatial rate map over time<sup>11,12</sup>. The recording session was divided into 5-min,  
605 non-overlapping segments. Half of the segments were randomly assigned to set 1, and the other half to set 2. Spatial  
606 rate maps were constructed separately for each set, and the correlation between the two maps was calculated. This  
607 process was repeated ten times, and the results were averaged to yield a final correlation value. Higher correlations  
608 indicate greater stability of the spatial rate map.

609 To assess significance of spatial coding for each cell, both of the above measures were also calculated for shuffled data.  
610 For each iteration, spikes were circularly shifted relative to behavior by a random time delay from 0 to the duration of  
611 the recording session. Spatial information and spatial stability values were calculated and stored. This process was  
612 repeated 200 times to construct a distribution of values representing the null hypothesis for each cell. Only cells for  
613 which both spatial information and spatial stability exceeded the 99th percentile of the corresponding shuffled  
614 distribution were considered significant.

615 We calculated spatial information and spatial stability at different time shifts between spikes and behavior, from  $-1$  s to  
616  $+1$  s. Only spatial excitatory cells that had peak values within this time range were included in the statistical tests.

617 To assess the significance of spatial coding across the long axis of the hippocampus, we used a linear mixed effects model,  
618 which is well-suited for datasets with multiple observations per subject — here, multiple cells recorded from each bird

619 (Oberg & Maloney 2007). We used the following model to test whether anterior position predicted spatial stability and/or  
620 normalized spatial information:

$$621 \quad X_{ij} = \beta_0 + \beta_1 y_{ij} + b_{0i} + \varepsilon_{ij}$$

622 where

$$623 \quad b_{0i} \sim N(0, \sigma_{b_0}^2)$$

$$624 \quad \varepsilon_{ij} \sim N(0, \sigma_{\varepsilon}^2)$$

625 and  $X_{ij}$  is the variable of interest (spatial stability or information) for the  $j^{\text{th}}$  cell from the  $i^{\text{th}}$  bird,  $\beta_0$  is the fixed intercept,  
626  $\beta_1$  is the fixed effect coefficient for anterior position,  $y_{ij}$  is anterior position,  $b_{0i}$  is the random intercept for each bird,  
627 and  $\varepsilon_{ij}$  is the residual error. Because normalized spatial information across cells was not normally distributed, we applied  
628 a Yeo-Johnson transformation with  $\lambda = 0$  to reduce positive skewness before applying the linear mixed effects model<sup>13</sup>.  
629 The model was then fit using the *fitlme* function in MATLAB using the default maximum likelihood method. Significance  
630 was determined by calculating the log-likelihood of the full model compared to a reduced model with the fixed slope  $\beta_1$   
631 removed using the *compare* function.

632 An extended model was constructed to assess spatial tuning across dorso-ventral and medio-lateral axes (Extended Data  
633 Fig. 7):

$$634 \quad X_{ij} = \beta_0 + \beta_1 y_{1ij} + \beta_2 y_{2ij} + \beta_3 y_{3ij} + b_{0i} + \varepsilon_{ij}$$

635 where  $\beta_1$ ,  $\beta_2$ , and  $\beta_3$  are the fixed effect coefficients for anterior, lateral, and ventral position, respectively,  $y_{1ij}$ ,  $y_{2ij}$ , and  
636  $y_{3ij}$  are the corresponding positions, and other variables are as above. Significance was assessed by removing one fixed  
637 effect at a time, and comparing the full model to this reduced model by taking the log-likelihood. Anterior position was  
638 significant in this extended model ( $p = 0.001$  and  $p = 10^{-5}$  for spatial information and spatial stability, respectively).

## 639 Analysis of speed and head direction tuning

640 Speed tuning was assessed by calculating the correlation coefficient between speed and firing rate. Speed was calculated  
641 as described above, and firing rate was calculated in a 1-s moving window. The resulting correlation coefficient was  
642 deemed significant if it exceeded 99.5%, or was below 0.05%, of the distribution for the shuffled dataset, in which spikes  
643 were randomly shifted relative to behavior (see above).

644 Head direction was calculated as the component of head angle (the vector from the point between the eyes to the tip of  
645 the beak) projected onto the plane of the arena floor. We binned head direction into 36° bins and calculated the average  
646 firing rate in each bin. The resulting values were used to compute the mean vector length (MVL) for the polar rate map  
647 of head direction<sup>11</sup>. MVL quantifies the strength of head direction tuning. A MVL equal to 0 indicates that firing rate is  
648 uniform across heading directions, whereas a MVL equal to 1 indicates perfect tuning to a single bin of head direction,  
649 and no firing for other directions. Head direction tuning was considered significant if the real MVL was larger than 99%  
650 of the MVL for the shuffled dataset.

## 651 Comparison of spatial activity in zebra finches and titmice

652 To compare neural characteristics of anterior and posterior hippocampus across avian species, we defined both  
653 functional and anatomical landmarks separating anterior and posterior hippocampus. Note that we do not imply any  
654 sharp division between anterior and posterior hippocampus. Instead, the goal was to allow comparison between similar  
655 regions across species. The anatomical landmark may be additionally useful for future analyses of other avian species,  
656 for which systematic recordings across the long axis are not available.

657 The functional landmark was defined as the inflection point of a logistic sigmoid function fitted to the percentage of  
658 spatial cells binned according to anterior position. The bins were 1 mm for titmice and 0.67 mm for zebra finch, resulting

659 in seven bins for each species. The region anterior to the functional landmark thus displayed a relatively high density of  
660 spatial cells in both species.

661 To define the anatomical landmark, we selected all transverse sections of the brain in which the hippocampus contacted  
662 both the dorsal brain surface and the midline. Anterior to these sections, the hippocampus was ventral to the  
663 hyperpallium and did not contact the brain surface. Posterior to these sections, the hippocampus was lateral to the  
664 cerebellum and did not contact the midline. The anatomical landmark separating anterior and posterior hippocampus  
665 was the location halfway between the anterior-most and the posterior-most selected brain sections. We found that  
666 roughly half of the hippocampal volume was anterior to this location, and half was posterior.

667 We used a linear mixed effects model to assess the significance of differences in spatial coding between species (similar  
668 to that described in the section above “*Analysis of spatial activity in the random foraging task*”). The model was as  
669 follows:

$$670 \quad X_{ij} = \beta_0 + \beta_1 s_{ij} + b_{0i} + \varepsilon_{ij}$$

671 where  $X_{ij}$  is the variable of interest (spatial stability or normalized information with Yeo-Johnson transformation) for the  
672  $j$ th cell from the  $i$ th bird,  $\beta_0$  is the fixed intercept,  $\beta_1$  is the fixed effect of species,  $s_{ij}$  is 0 for titmouse and 1 for zebra  
673 finch,  $b_{0i}$  is the random intercept for each bird, and  $\varepsilon_{ij}$  is the residual error. Each full model was compared to a reduced  
674 model with the fixed effect of species removed by taking the log-likelihood ratio.

675 We also assessed whether the difference between species was larger in anterior hippocampus compared to posterior  
676 hippocampus. We calculated the average difference in spatial information between species for anterior hippocampus  
677 ( $\Delta A$ ) and for posterior hippocampus ( $\Delta P$ ), and compared the difference between these two values ( $\Delta A - \Delta P$ ) to the result  
678 from a shuffled distribution. The shuffled distribution was generated by randomly assigning cells to either anterior or  
679 posterior hippocampus within each bird.

## 680 Analysis of sharp-wave ripples across the long axis

681 Putative sharp-wave ripples (SWRs) were detected using criteria similar to those used in rodents<sup>14,15</sup>. Some recordings  
682 contained sporadic but large movement-related or electrical artifacts; these were detected by setting a threshold for  
683 absolute deviation from baseline, chosen separately for each recording, and masking data within 0.4 s of each timepoint  
684 above threshold. To detect ripples, the raw LFP was downsampled to 1000 samples/s and then band-pass filtered  
685 between 100–200 Hz (Hamming window FIR filter). The analytic signal of the Hilbert transform of the result was  
686 calculated (Matlab command *hilbert*), and its magnitude was smoothed with a 4-sigma Gaussian filter to obtain the  
687 envelope of ripple power. Putative SWRs were identified as peaks in the ripple envelope that exceeded 5 standard  
688 deviations of the mean and stayed above 3 standard deviations for at least 15 ms. The time of each SWR used for  
689 alignment in all analyses was the time of the largest ripple trough adjacent to the peak in the ripple envelope.  
690 Spectrograms for example single events were generated using a continuous Morse wavelet transformation (Fig. 4a,  
691 Extended Data Fig. 8f).

692 To measure the spatial extent of a single SWR (Fig. 4d), we first detected the number of participating electrodes, as  
693 follows. All SWR times were concatenated across all electrodes and sorted, and clusters of inter-event-intervals less than  
694 75 ms were defined as a multi-electrode SWR. The cutoff of 75 ms was determined by inspection of histograms of inter-  
695 event-intervals on a log scale, which displayed clear bimodality with a boundary around 75 ms – analogous to methods  
696 used to detect bursts of spikes in single neurons<sup>16</sup>. The number of electrodes participating in each multi-electrode SWR  
697 was then multiplied by the spacing between electrodes (0.67 mm). Speed and direction of propagation were calculated  
698 for events occurring on at least three electrodes by fitting a regression line to the relationship between electrode position  
699 and time of the SWR.

700 To visualize the instantaneous speed and direction of SWRs (Fig. 4e), we detected all triplets of SWRs that appeared  
701 consecutively on three adjacent electrodes. For each triplet, the correlation coefficient between electrode position and

702 SWR time was calculated. Triplets with a correlation coefficient above 0.9 were deemed propagating triplets, and their  
703 velocity was calculated by dividing the spacing between electrodes by the mean inter-event interval:

$$704 \quad v = \frac{0.67 \text{ mm}}{(t_3 - t_1)/2}$$

705 This analysis was repeated separately for SWR events that appeared consecutively on three adjacent electrodes in the  
706 posterior→anterior and anterior→posterior directions. Finally, it was repeated for a shuffled dataset in which the times  
707 of SWRs for each electrode were circularly shifted by a random time from 0 to the duration of the recording, independent  
708 from all other electrodes. This shuffling procedure yielded fewer propagating triplets, and there was no peak in the  
709 histogram at faster speeds (Fig. 4e, grey trace).

## 710 Current source density analysis of SWRs

711 We analyzed the current source density (CSD) during SWRs in three titmice, two of which had electrodes implanted in  
712 the transverse plane, and one of which had electrodes implanted in the sagittal plane. All titmice were used to analyze  
713 one-dimensional CSD along the radial axis, and the two titmice with electrodes in the transverse plane were additionally  
714 used to analyze two-dimensional CSD. For most sessions, the electrodes were advanced in increments of 1/8<sup>th</sup> of a turn,  
715 allowing high-resolution sampling along the radial axis.

716 To calculate the CSD, the raw LFP from each electrode and each session was first low-pass filtered (40 Hz, Hamming  
717 window FIR filter) and averaged across all SWRs. The average voltage at the time of the SWR was then extracted (“sharp  
718 wave voltage”). The location of each electrode was determined histologically, creating a map of sharp wave voltages  
719 across location in the hippocampus. Only locations with at least 100 detected SWRs were included in the analysis.

720 For one-dimensional CSD analysis, the position along the radial axis was determined by finding the shortest distance to  
721 the lateral ventricle ( $d_v$ ) and the shortest distance to the dorsal surface of the hippocampus ( $d_s$ ), and then taking the ratio  
722  $d_v/(d_v + d_s)$ . For each electrode, the sharp wave voltages recorded across depths were smoothed and upsampled to 101  
723 uniformly spaced positions along the radial axis using a cubic smoothing spline (Matlab command *csaps* with smoothing  
724 parameter 0.996). Finally, the one-dimensional CSD was calculated as the negative second spatial derivative of voltage<sup>17</sup>.  
725 Only electrodes for which at least 65% of the radial axis was recorded were included. The average CSD across electrodes  
726 was then calculated for each bird.

727 For two-dimensional CSD analysis, we used a cubic spline (smoothing parameter 0.95) to smooth the sharp wave voltages  
728 and upsample to 0.01 mm spacing. This map of sharp wave voltages was then spatially differentiated twice to yield the  
729 two-dimensional CSD<sup>17</sup>.

## 730 Analysis of theta frequency oscillations

731 We examined whether theta-frequency oscillations (6–9 Hz)<sup>18</sup> were over-represented in the hippocampus of birds during  
732 a range of behavioral states: movement (periods during the open field and linear track experiments for which the bird  
733 was not stationary for more than 5 s), awake immobility (periods during open field and linear track experiments during  
734 which the bird was stationary for at least 5 s), and sleep. Power spectra were calculated using Welch’s power spectral  
735 density estimate on 1000 separate 1-s segments of the raw LFP for each session. Spectra were averaged across segments,  
736 and then averaged across sessions within each bird.

## 737 Extended data references

- 738 1. Barthó, P. et al. Characterization of neocortical principal cells and interneurons by network interactions and  
739 extracellular features. *J. Neurophysiol.* 92, 600–608 (2004).
- 740 2. Csicsvari, J., Hirase, H., Czurkó, A., Mamiya, A. & Buzsáki, G. Oscillatory coupling of hippocampal pyramidal cells  
741 and interneurons in the behaving rat. *J. Neurosci.* 19, 274–287 (1999).

- 742 3. Sherry, D. F. & Vaccarino, A. L. Hippocampus and memory for food caches in black-capped chickadees. *Behav.*  
743 *Neurosci.* 103, 308–318 (1989).
- 744 4. Abellán, A., Desfilis, E. & Medina, L. Combinatorial expression of Lef1, Lhx2, Lhx5, Lhx9, Lmo3, Lmo4, and Prox1  
745 helps to identify comparable subdivisions in the developing hippocampal formation of mouse and chicken. *Front.*  
746 *Neuroanat.* 8, 59 (2014).
- 747 5. Tosches, M. A. et al. Evolution of pallium, hippocampus, and cortical cell types revealed by single-cell  
748 transcriptomics in reptiles. *Science* 360, 881–888 (2018).
- 749 6. Gupta, S., Maurya, R., Saxena, M. & Sen, J. Defining structural homology between the mammalian and avian  
750 hippocampus through conserved gene expression patterns observed in the chick embryo. *Dev. Biol.* 366, 125–141  
751 (2012).
- 752 7. Mizuseki, K., Sirota, A., Pastalkova, E. & Buzsáki, G. Theta oscillations provide temporal windows for local circuit  
753 computation in the entorhinal-hippocampal loop. *Neuron* 64, 267–280 (2009).
- 754 8. Alonso, J. M. & Martinez, L. M. Functional connectivity between simple cells and complex cells in cat striate cortex.  
755 *Nat. Neurosci.* 1, 395–403 (1998).
- 756 9. Aertsen, A. M. H. J. & Gerstein, G. L. Evaluation of Neuronal Connectivity: Sensitivity of Cross-Correlation. *Brain*  
757 *Res.* 340, 341–354 (1985).
- 758 10. Skaggs, W. E., McNaughton, B. L., Gothard, K. M. & Markus, E. J. An Information-Theoretic Approach to  
759 Deciphering the Hippocampal Code. *Adv. Neural Inf. Process. Syst.* 1030–1037 (1993)  
760 doi:10.1109/PROC.1977.10559.
- 761 11. Giocomo, L. M. et al. Topography of head direction cells in medial entorhinal cortex. *Curr. Biol.* 24, 252–262 (2014).
- 762 12. Markus, E. J., Barnes, C. A., McNaughton, B. L., Gladden, V. L. & Skaggs, W. E. Spatial information content and  
763 reliability of hippocampal CA1 neurons: Effects of visual input. *Hippocampus* 4, 410–421 (1994).
- 764 13. Yeo, I.-K. & Johnson, R. A. A new family of power transformations to improve normality or symmetry. *Biometrika*  
765 87, 954–959 (2000).
- 766 14. Karlsson, M. P. & Frank, L. M. Awake replay of remote experiences in the hippocampus. *Nat. Neurosci.* 12, 913–  
767 918 (2009).
- 768 15. Mizuseki, K., Diba, K., Pastalkova, E. & Buzsaki, G. Hippocampal CA1 pyramidal cells form functionally distinct  
769 sublayers. *Nat. Neurosci.* 14, 1174–81 (2011).
- 770 16. Pasquale, V., Martinoia, S. & Chiappalone, M. A self-adapting approach for the detection of bursts and network  
771 bursts in neuronal cultures. *J. Comput. Neurosci.* 29, 213–229 (2010).
- 772 17. Mitzdorf, U. Current source-density method and application in cat cerebral cortex: Investigation of evoked  
773 potentials and EEG phenomena. *Physiol. Rev.* 65, 37–100 (1985).
- 774 18. Buzsaki, G. Theta oscillations in the hippocampus. *Neuron* 33, 325–340 (2002).
